# Supplementary material for: A low-polarity small organic molecule with a stable keto form for photocatalytic H2 evolution
Source: Royal Society of Chemistry journal article supplement (doi:10.1039/d2cc03951f), 2022-01-01
Supplement: d2cc03951f1.pdf [file d2cc03951f1.pdf]

## Supplementary Information

### Low-polarity small organic molecule with stable keto form for photocatalytic H<sub>2</sub> evolution

Qing Yang, Cefei Zhang, Fangli Yi, Xinyu Li, Yiqi Yuan, Kewei Liu, Hongmei Cao,  
Hongjian Yan\*, Zhishan Su\*

College of Chemistry, Sichuan University, Chengdu, Sichuan, 610065, China

E-mail: [hjyan@scu.edu.cn](mailto:hjyan@scu.edu.cn);

Tel: +86-1355-1341-892

## Experimental Details

### Materials:

All chemicals were commercially available and used without further purification. Triformylphloroglucinol, and 4-Aminobenzonitrile were purchased from Alpha chemicals. 4-amino-3-methoxybenzonitrile, 4-amino-3-methylbenzonitrile, 4-amino-3-hydroxybenzonitrile, and 4-amino-3-fluorobenzonitrile were purchased from Fluorochem. p-nitroaniline, 4-aminophenol, 4-fluoroaniline, 4-aminobenzoic acid, and p-methyl aniline,  $\text{Ru}_3(\text{CO})_{12}$  were purchased from Aladdin chemicals. Salicylaldehyde, Aniline, acetone, mesitylene, 1,4-dioxane, ethanol, sodium sulphate, tetrahydrofuran (THF) and propan-2-ol were purchased from Kelong chemicals. 2,4-dihydroxyisophthalaldehyde was obtained from Bidepharm.

### Synthesis of SOMs:

The synthesis method of SOMs was as shown below. Typically, Salicylaldehyde (12.2 mg, 0.10 mmol), 2,4-dihydroxyisophthalaldehyde (18.3 mg, 0.11 mmol), 2-hydroxybenzene-1,3,5-tricarbaldehyde (8.9 mg, 0.05 mmol), 2,4-dihydroxybenzene-1,3,5-tricarbaldehyde (10 mg, 0.05 mmol) or triformylphloroglucinol (Tp, 11.9 mg, 0.05 mmol) and 4-Aminobenzonitrile (ABN, 40.0 mg, 0.34 mmol) were ultrasonically dispersed into 4 mL ethanol homogeneously and then solvothermally treated at 80 °C for 24 hours, respectively (sample was noted as **1**, **2**, **3**, **4** and **5**). During the whole process, the light-yellow, orange, or red precipitate appeared. As comparison, other monomer with different substituent (-F, -Me, -OMe, -NO<sub>2</sub>, -COOH, -OH) replacing β-H or -CN group of ABN was reacted with TP, respectively, in the same reaction

condition. The obtained product was immersed in acetone overnight and washed with ethanol, THF, acetone for several times until all residual unreacted reagents were cleaned, followed by dried at 70 °C under vacuum. Sample **1** and **3** was recrystallized for 2-3 times in ethanol. Sample **1**: the experimental elemental composition and containment ( $C_{14}H_{10}N_2O$ : C(73.25%), N(11.78%), O(8.67%), H(6.30%),  $^{13}C$  solid state NMR(500 Hz):  $\delta$  112.3, 119.04, 129.0, 136.1, 147.8, 163.4 and the relative molecular mass (222.92 (m/z)), Anal. Calcd. for  $C_{14}H_{10}N_2O$ : C(75.66%), N(12.60%), O(7.20%), H(4.54%) and 222.25 (m/z). Sample **2**: the experimental elemental composition and containment ( $C_{22}H_{14}N_4O_2$ : C (71.26%), N (14.59%), O (11.06%), H (3.09%),  $^{13}C$  solid state NMR(500 Hz):  $\delta$  108.3, 112.2, 118.2, 134.7, 142.8, 147.5, 184.3 and the relative molecular mass (366.91 (m/z)), Anal. Calcd. for  $C_{22}H_{14}N_4O_2$ : C (72.12%), N (15.29%), O (8.73%), H (3.85%) and 366.38 (m/z). Sample **3**: the relative molecular mass (479.27 (m/z)),  $^{13}C$  solid state NMR (500 Hz):  $\delta$  108.8, 118.5, 132.1, 135.4, 156.4, 164.1. Anal. Calcd. For  $C_{30}H_{18}N_6O$ : 478.52. Sample **4**: the relative molecular mass (495.30 (m/z)),  $^{13}C$  solid state NMR (500 Hz):  $\delta$  108.4, 117.6, 121.4, 132.4, 150.1, 156.4, 184.1, Anal. Calcd. For  $C_{30}H_{18}N_6O_2$ : 494.15 (m/z). Sample **5**: the experimental elemental composition and containment ( $C_{30}H_{18}N_6O_3$ : C (70.06%), N (16.45%), O (10.38%), H (3.11%)) and the relative molecular mass (510.91(m/z)),  $^{13}C$  solid state NMR (500 Hz):  $\delta$  107.9, 118.7, 133.8, 141.3, 182.7, Anal. Calcd. for  $C_{30}H_{18}N_6O_3$ : C (70.58%), N (16.46%), O (9.40%), H (3.55%) and 510.51 (m/z).

**Characterization:** Firstly, the organic element analysis (elemental vario EL cube,

Germany) and MALDI-TOF-MS (AXIMA Performance) were applied to measure the element component, content and relative molecular mass. The solid state  $^{13}\text{C}$  NMR (AVANCE III 500MHz), the liquid  $^1\text{H}$  NMR (AVANCE III HD) and FT-IR (INVENIOR, bruker) were used to clarify the characteristic functional groups. The optical properties and charge separation ability were analyzed by UV-vis DRS (UV3600, Shimadzu) and fluorescence spectrometer (Hitachi F-7000). The Brunauer-Emmett-Teller (BET) surface area were obtained by using nitrogen adsorption-desorption curve (Micromeritics). The thermal properties were tested by METTLER TOLEDO DSC1, under  $\text{N}_2$  flow and  $10\text{ }^\circ\text{C}/\text{min}$  heating rate between  $30\text{ }^\circ\text{C}$  and  $600\text{ }^\circ\text{C}$ . The X-ray photoelectron spectroscopy (XPS, Thermo Fisher 250 XI) was used for surface analysis of sample **5** after- or before- irradiation.

The analysis of photocurrent, electrochemical impedance spectroscopy (EIS) and Mott-Schottky curve were realized on electrochemical workstation (CHI660E). The fabrication of work electrode for the electrochemical test was as follows: 5 mg sample powder was placed into centrifuge tubes with the mixture solution of 150  $\mu\text{L}$  ethanol, 150  $\mu\text{L}$  isopropyl alcohol and 10  $\mu\text{L}$  naphthol and formed the homogeneous dispersion by ultrasonic. Draw 40  $\mu\text{L}$  dispersion to be coated on the surface of FTO conductive glass to generate uniformly  $1.0 \times 1.0\text{ cm}$  film. At last, the FTO plate was placed into vacuum oven to dry for 5 h at  $70\text{ }^\circ\text{C}$ . The photoelectrochemical measurement was completed via a three-electrode model. Ag/AgCl electrode as the reference electrode, Pt piece as the counter electrode, and 0.1 M  $\text{Na}_2\text{SO}_4$  as electrolyte solution in this model.

### **Photocatalytic measurement.**

The photocatalytic water reduction reaction was performed in an airtight and homothermic glass photoreactor with external light lamp and gas circulation system. 10 mg SOM photocatalyst and quantitative  $\text{H}_2\text{PtCl}_6$  solution were dropped in 200 mL aqueous triethanolamine (TEOA, 10 vol%). Before photocatalytic reaction, the whole system was evacuated to hold vacuum state. Prior to the catalytic reaction, Pt cocatalyst was loaded on sample **5** through the in-situ photoreduction of  $\text{H}_2\text{PtCl}_6$  under the 30-min irradiation of full-spectrum 300W Xe lamp (Ceralux 300BF). After that, photocatalytic reaction was proceeded under the visible-light irradiation (300W Xe lamp installed with light filter,  $\lambda > 400\text{nm}$ ). The amount of photocatalytic  $\text{H}_2$  production was monitored in real time by gas chromatograph (GC-112AT). The loading of  $\text{RuO}_2$  (consulting the previous literature [1]): 20 mg SOM-5 was impregnated in 15 mL THF solution with quantitative amount of  $\text{Ru}_3(\text{CO})_{12}$ . The former was maintained at 60 °C. After the evaporation of the solvent, the photocatalyst powder was transferred to muffle furnace and heated at 300 °C for 1h.

The calculation of apparent quantum yield (AQY): 0.1 g photocatalyst and 200 mL TEOA solution (Pt as cocatalyst) was dispersed in the same photocatalytic reaction apparatus, 300 W Xe lamp installed with optical filter ( $\lambda = 425\text{ nm}$ ) as incident light. The amount of  $\text{H}_2$  production was detected by gas chromatograph. The amount of photon was tested by ThorLabs S120C photo-diode.

The calculation of AQY by the following formula:

$$\eta = \frac{2 \times \text{moles of H}_2 \text{ evolved}}{\text{moles of the incident photons}} \times 100\%$$

## **Theoretical calculation**

Gaussian 09<sup>[2]</sup> program was employed to conduct all calculation, by using M062X<sup>[3,4]</sup>-D3<sup>[5,6]</sup> density functional with the 6-31+G(d,p) basis set. The chemical structure was optimized and characterized by frequency analysis at 298 K. The corresponding theoretical energy level was calculated by Time-dependent density functional theory (TD-DFT). Spin population was obtained using Multiwfn 3.8 software<sup>[7]</sup> , and the corresponding isosurface plots were generated by VMD 1.9.3 package<sup>[8]</sup>. The optimized geometries and the corresponding structural parameters are as shown in Figure S21 and Table S5.

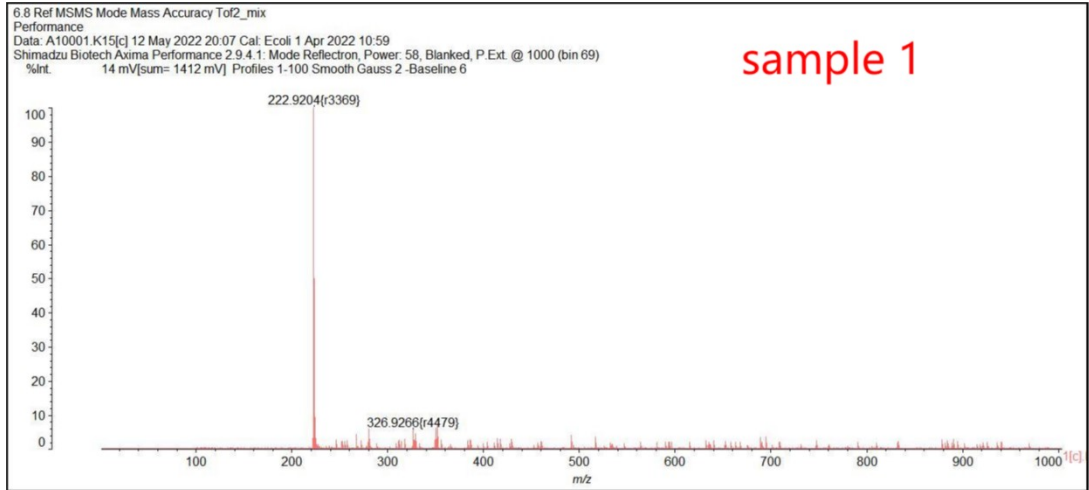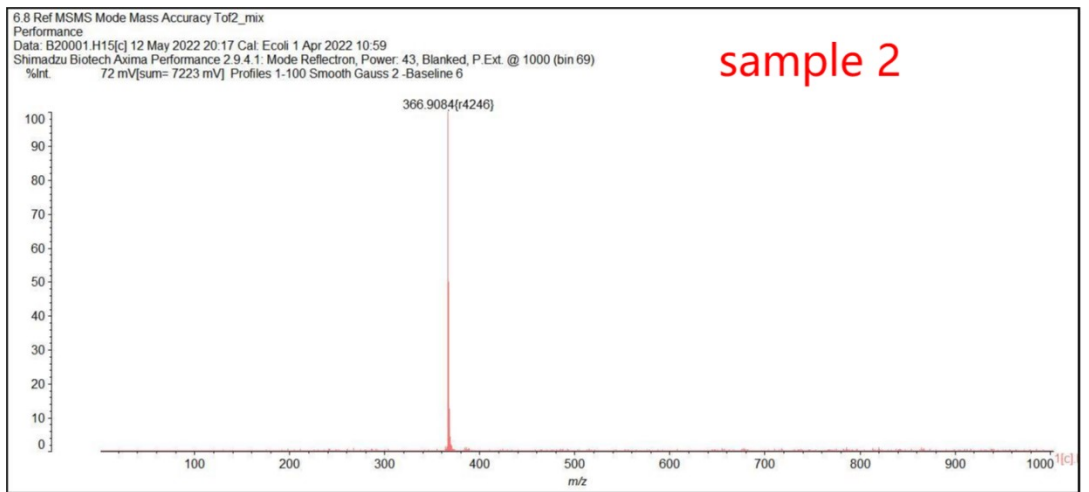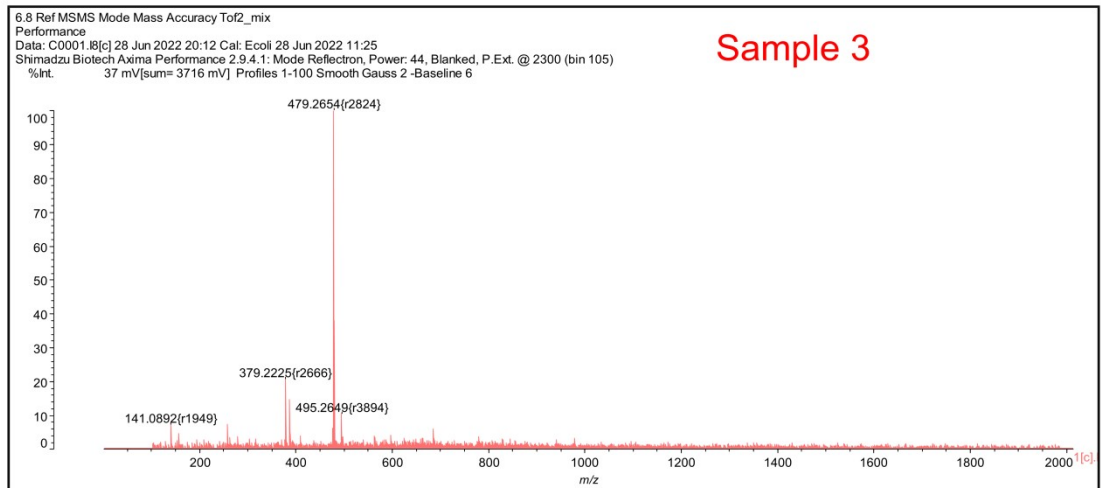

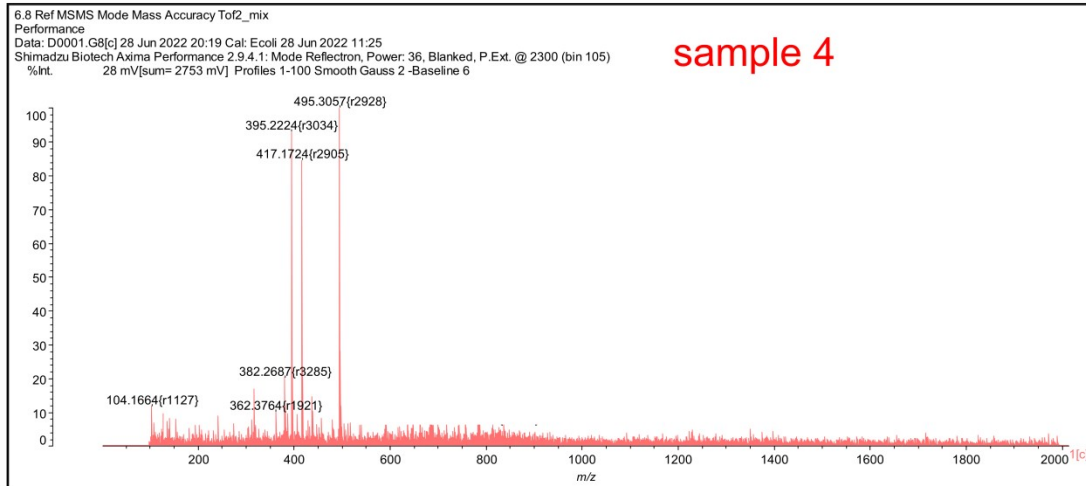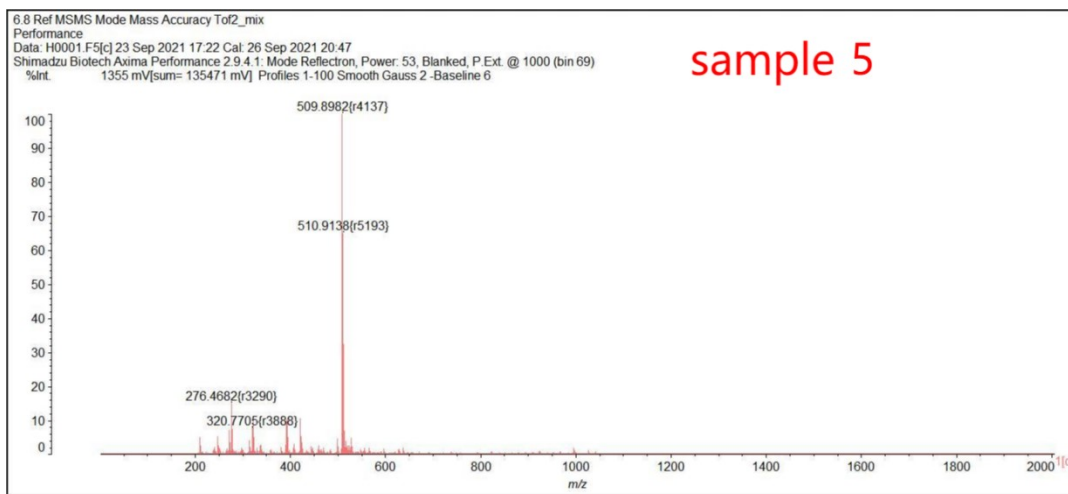

Figure S1: The MALDI-TOF-MS results of sample 1-5.



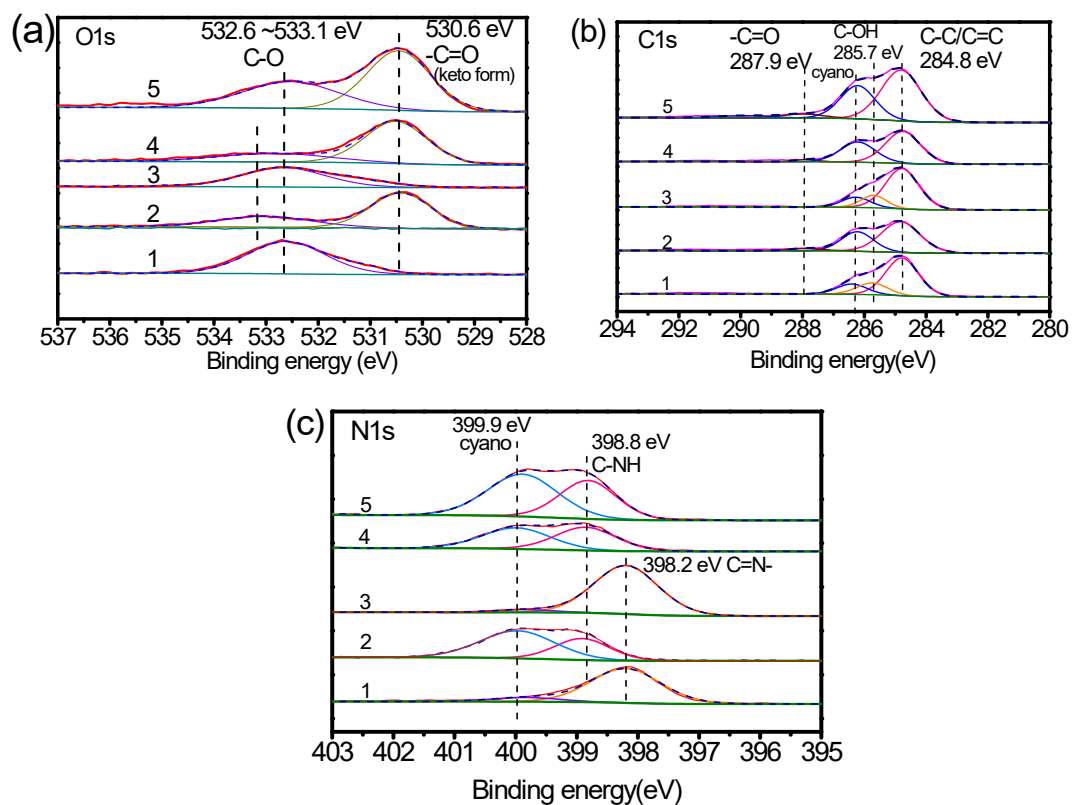

Figure S2. the O1s(a), C1s(b) and N1s(c) spectra of high-resolution XPS spectra of sample 1-5.

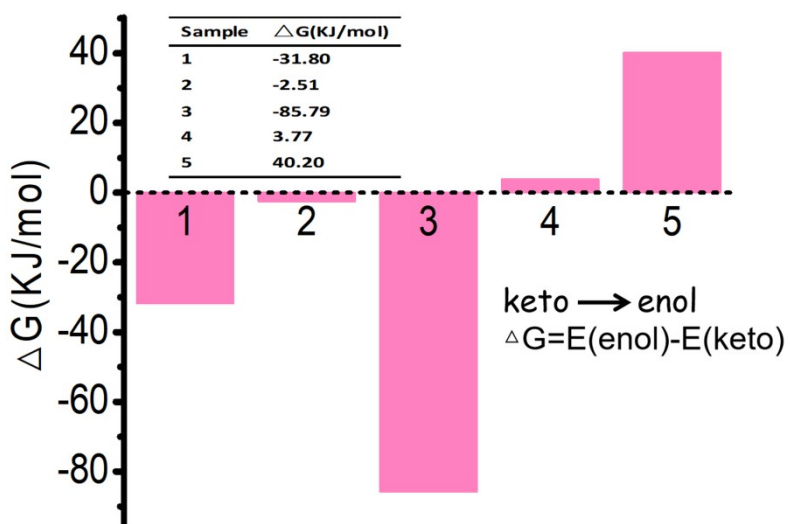

Figure S3. The energy difference between corresponding enol structure and keto form structure of sample 1, 2, 3, 4 and 5, respectively.

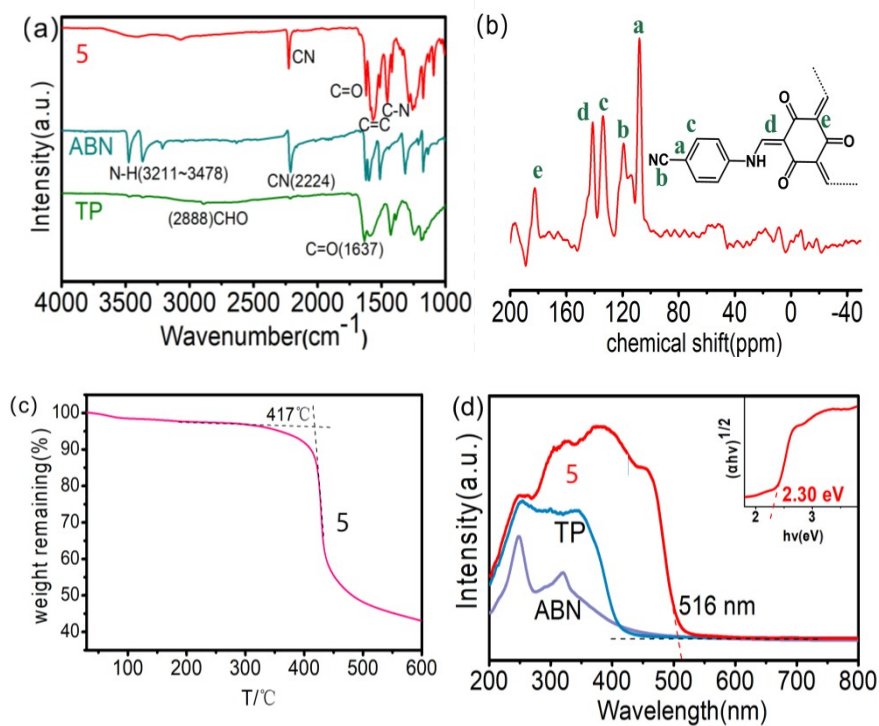

Figure S4. FT-IR spectra (a), <sup>13</sup>C solid-state NMR (b), thermogravimetry (TG) (c) and the UV-vis DRS (d) curve of **5**. The inset in (d) shows the bandgap of **5**.

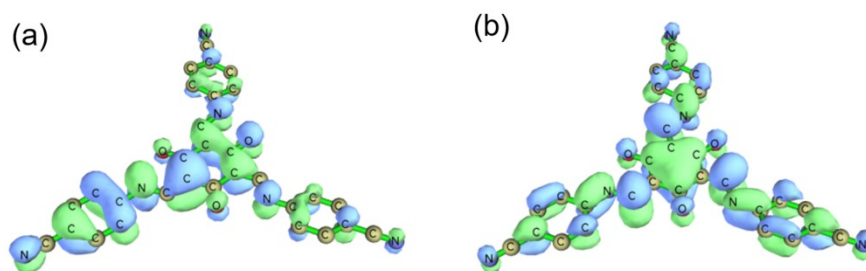

Figure S5. The HOMO(a) and LUMO(b) level of **5**.

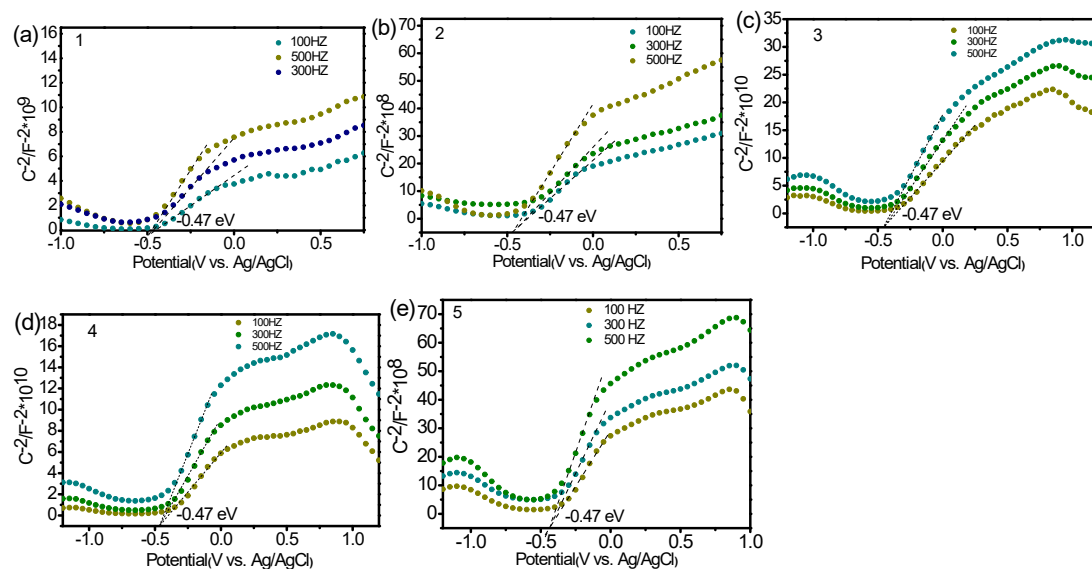

Figure S6. The Mott-Schottky curves of sample 1-5 (a)-(e) (100 HZ, 300HZ, 500HZ). The intercept on the x axis is the value of the flat band (vs. Ag/AgCl).

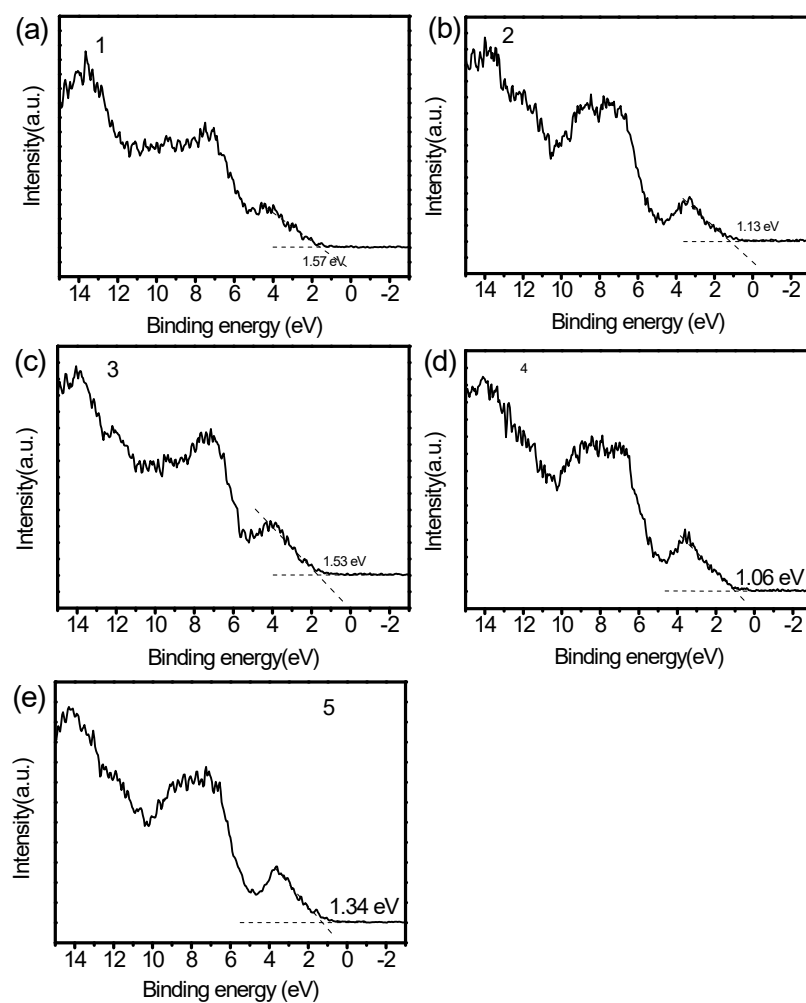

Figure S7. The VB-XPS of sample 1-5 (a-e).

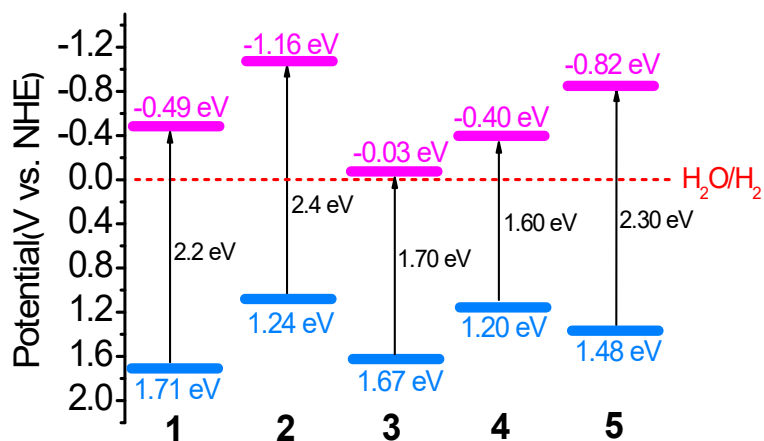

Figure S8. The energy band alignments of sample 1-5 respectively.

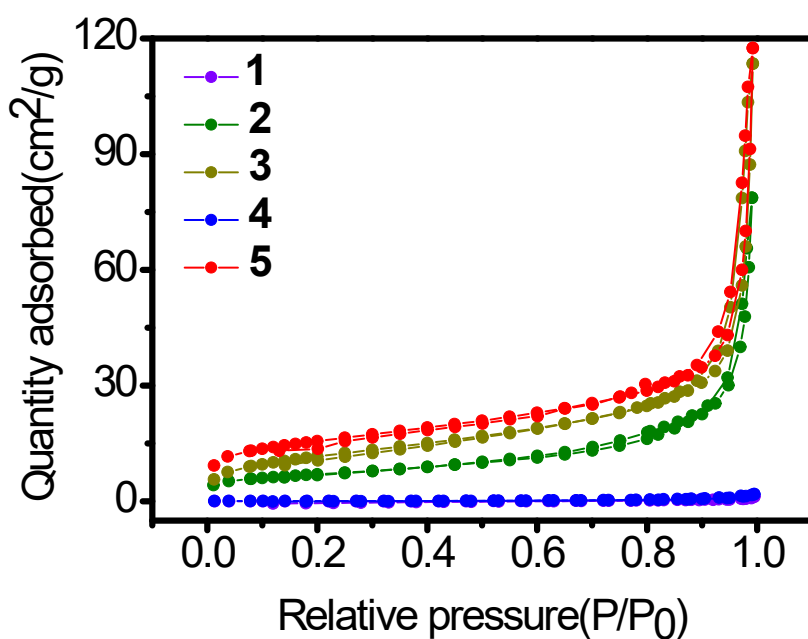

Figure S9. Nitrogen adsorption-desorption isotherm of sample 1-5.

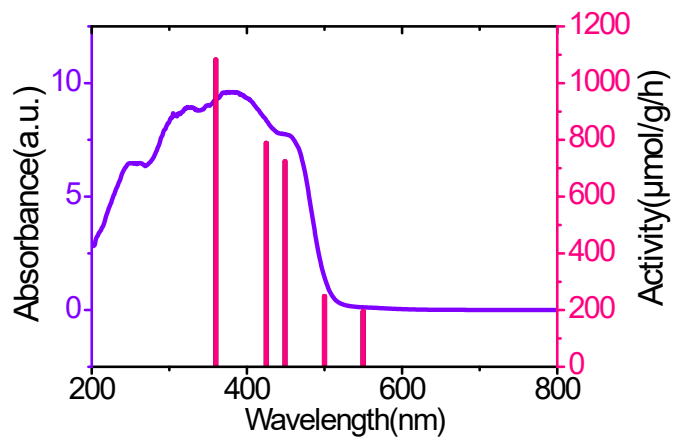

Figure S10. The activity of 5 with changing incident-light wavelength.

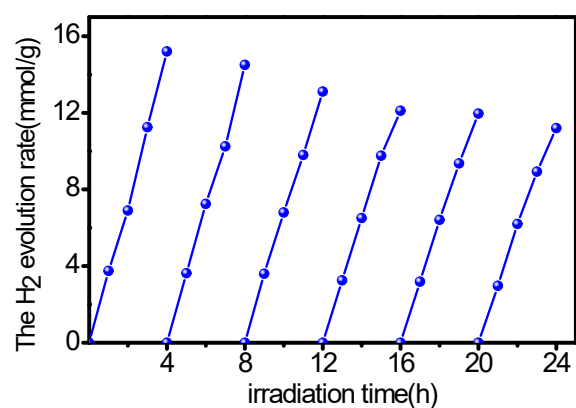

Figure S11. The photostability test of **5** (6 cycles, 24h-irradiation).

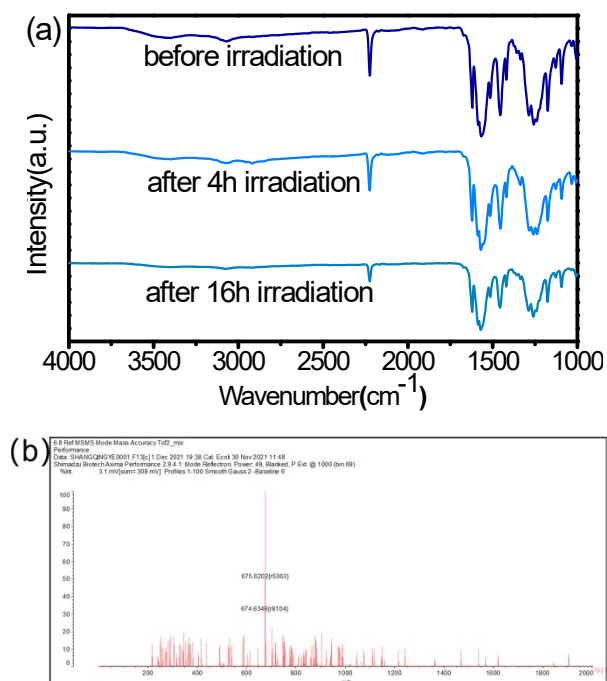

Figure S12. The FT-IR spectra of **5** after-irradiation and the MALDI-TOF-MS of supernatants from the reaction solution.

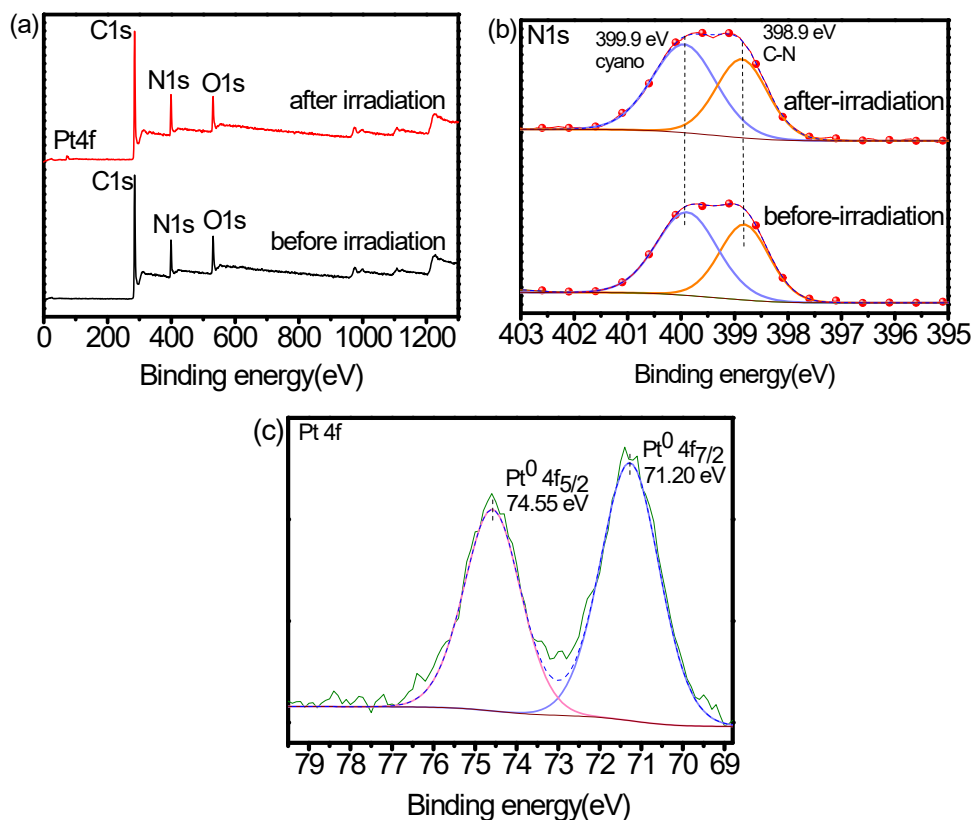

Figure S13. The high resolution XPS spectra of N 1s(a), Pt 4f (b).

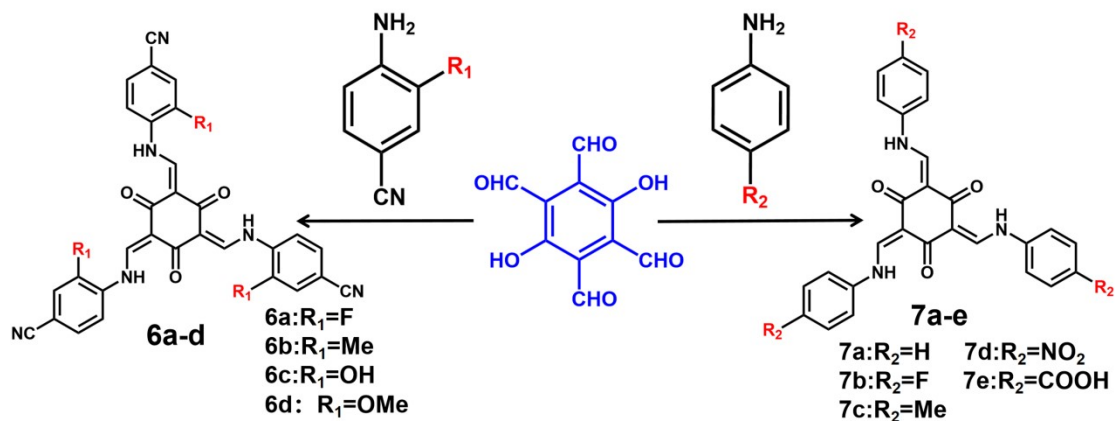

Figure S14. The synthetic route of **6a-d** and **7a-e**. ( $\text{R}_1$  and  $\text{R}_2$  substituent replace  $\beta$ -H or cyan group of ABN, respectively)

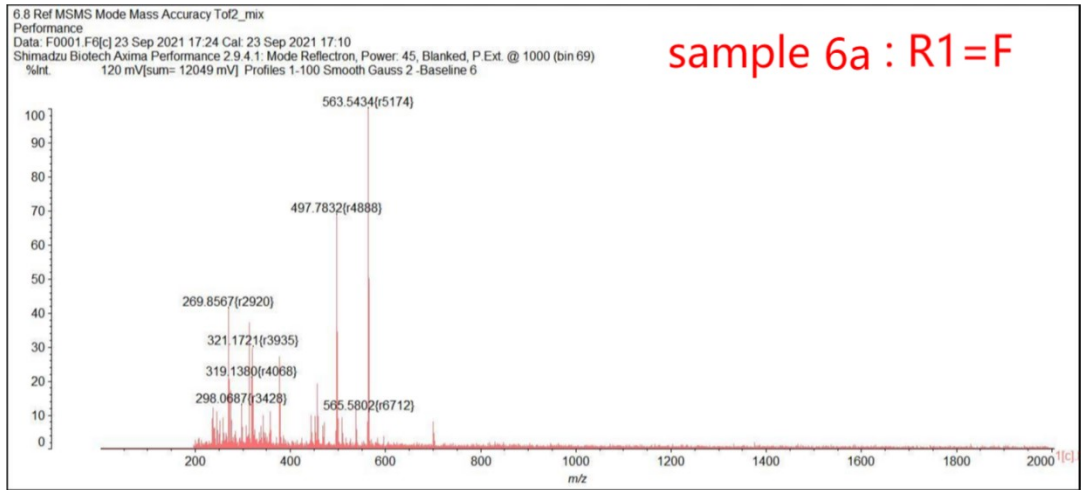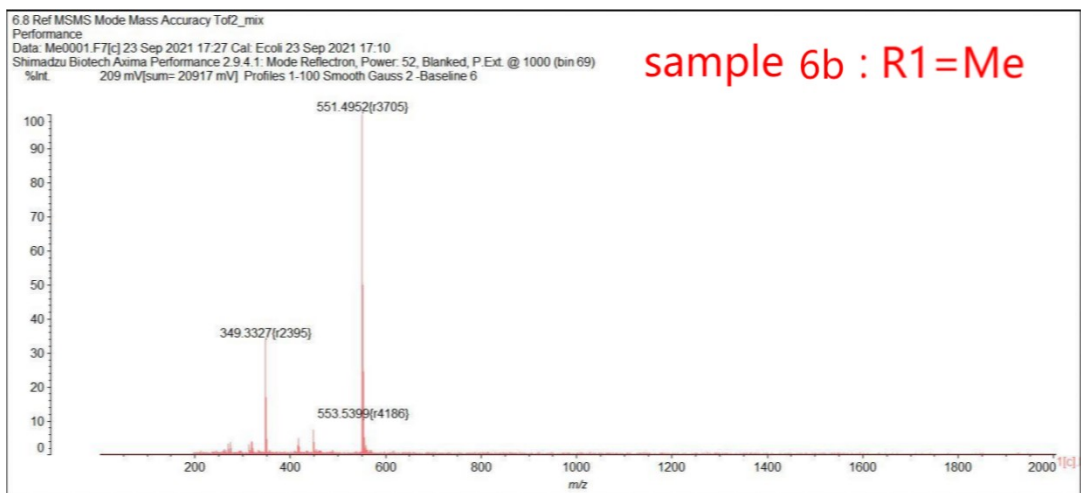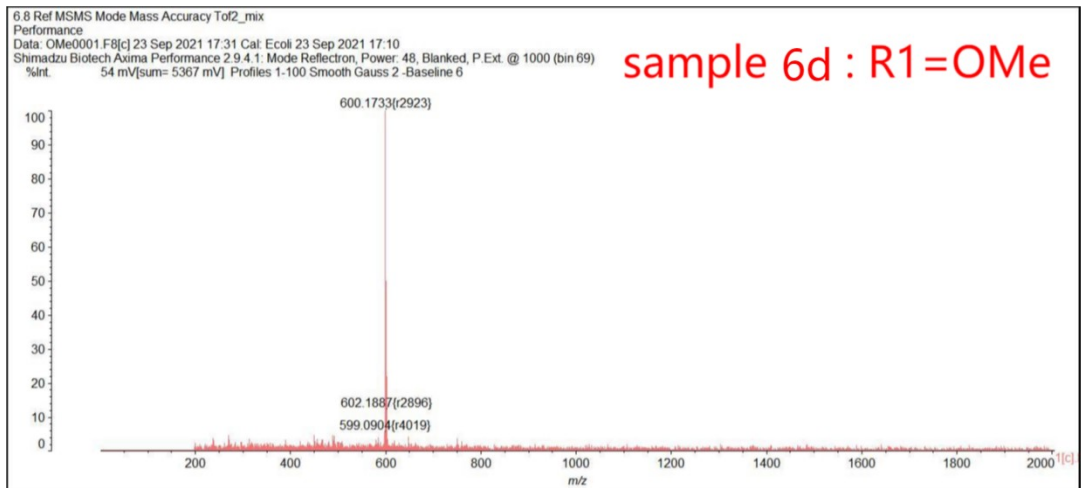

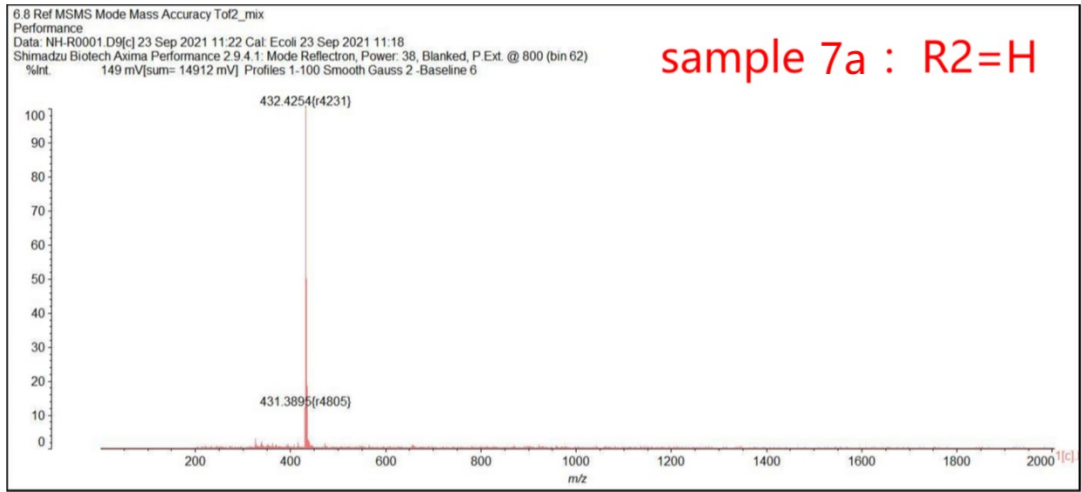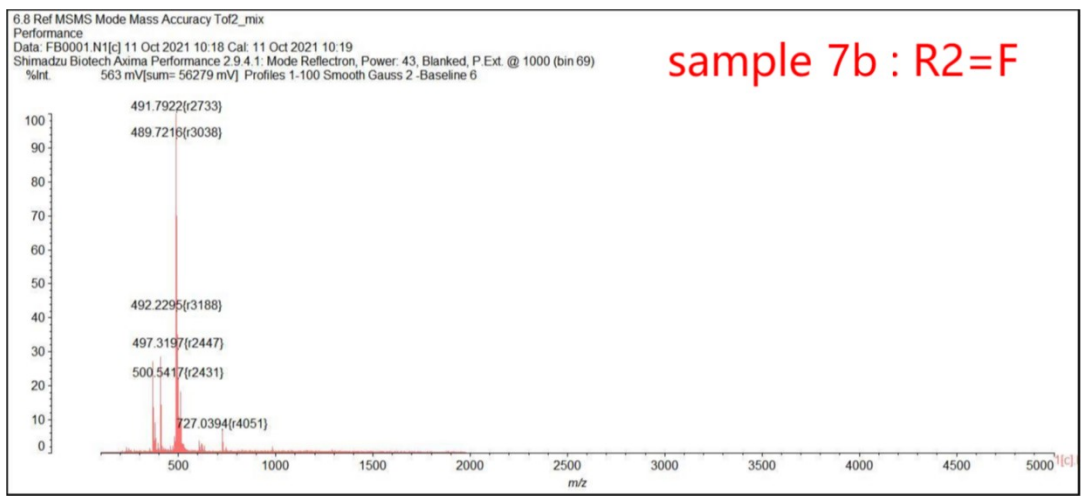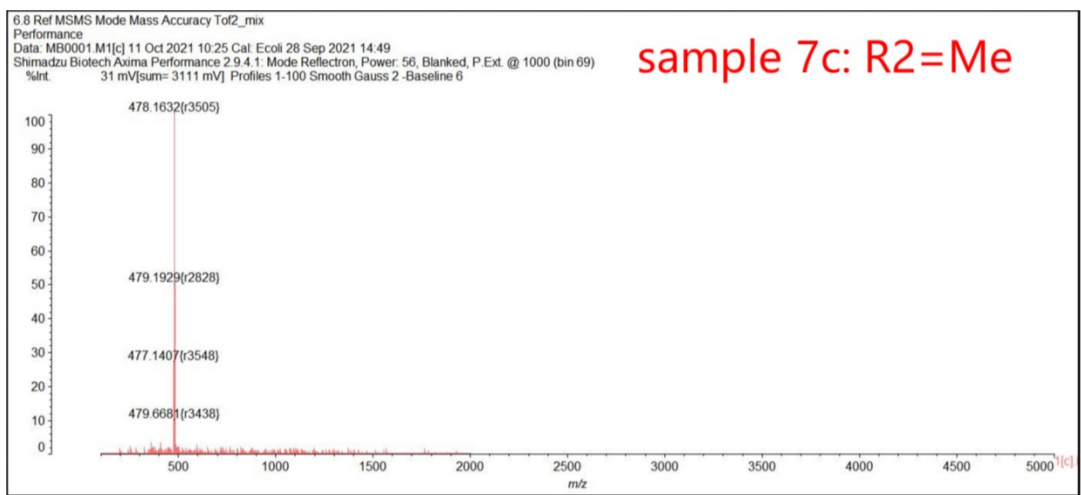



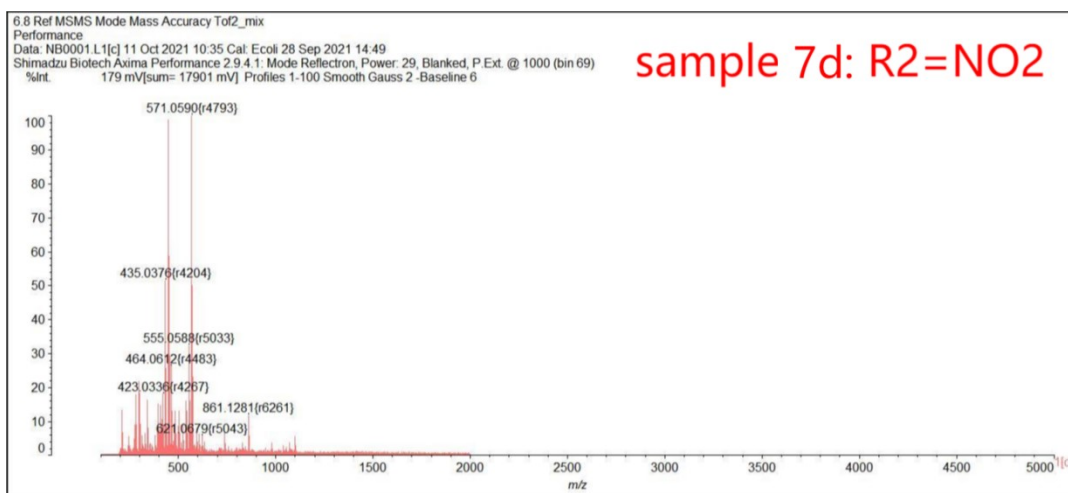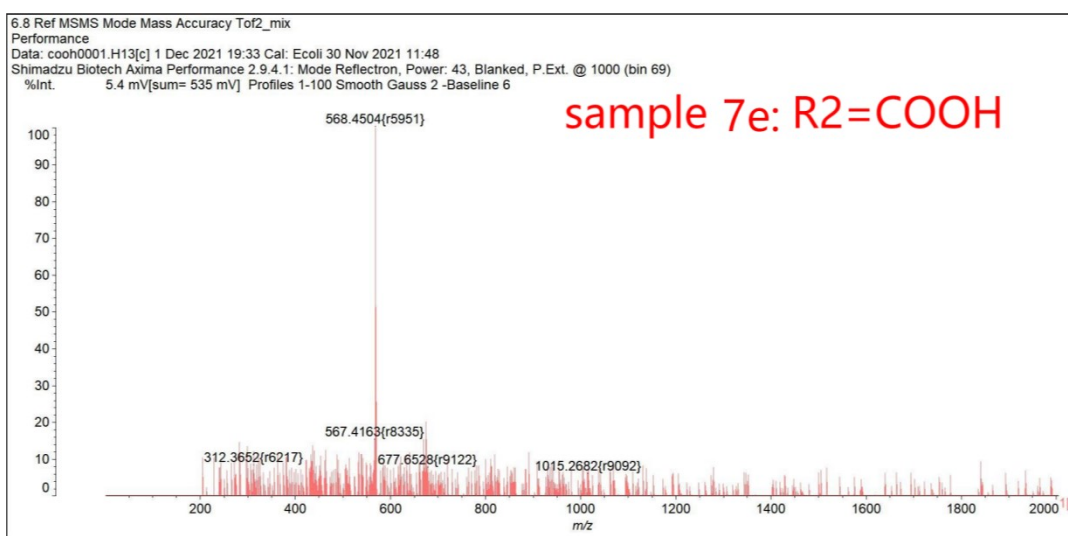

Figure S15. The MALDI-TOF-MS results of sample 1-3 and 4a-d, 5a-e.

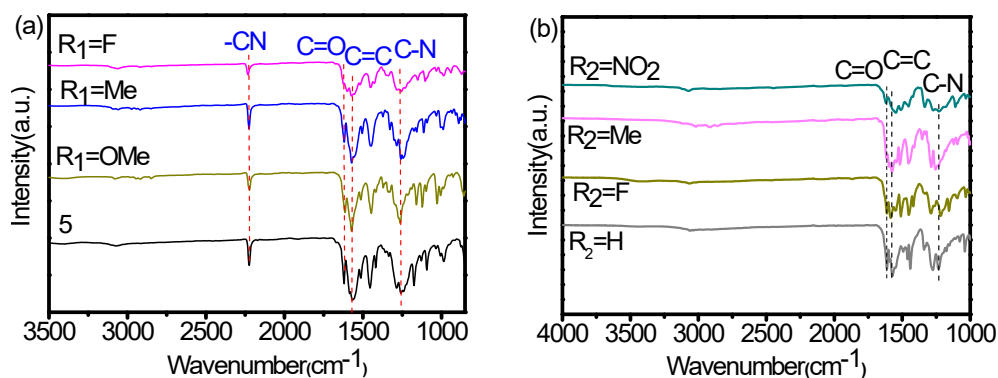

Figure S16. The Fourier Transform Infrared Spectra (FT-IR) of **5**, R<sub>1</sub>=F, Me, OMe(a) and R<sub>2</sub>=H, F, Me, NO<sub>2</sub>(b).

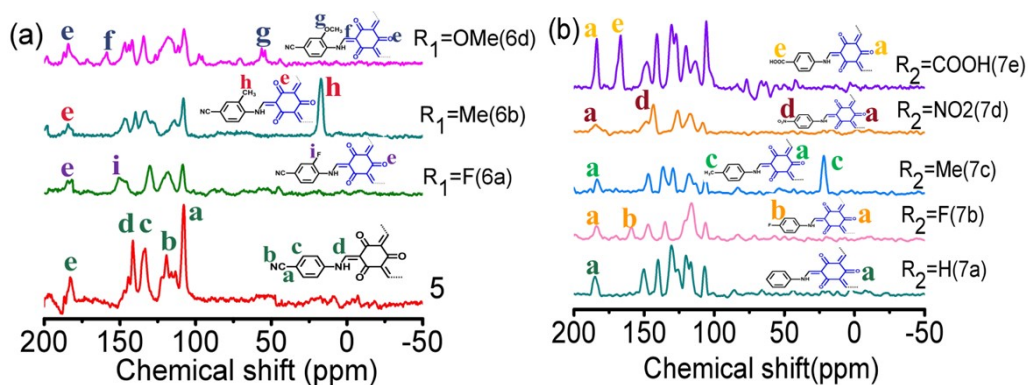

Figure S17. The  $^{13}\text{C}$  solid-state nuclear magnetic resonance (NMR) of **5** ( $\delta$  107.9, 118.7, 133.8, 141.3, 182.7(C=O)),  $\text{R}_1=\text{F}$  ( $\delta$  108.5, 118.2, 132.1, 150.5, 182.4(C=O)),  $\text{R}_1=\text{Me}$  ( $\delta$  17.1, 108.2, 114.3, 133.7, 140.1, 146.5, 183.9(C=O)),  $\text{R}_1=\text{OMe}$  ( $\delta$  56.2(OMe), 107.4, 118.2, 134.2, 142.0, 147.2, 158.9, 184.1(C=O)) (a) and  $\text{R}_2=\text{H}$  ( $\delta$  107.5, 117.2, 130.9, 140.1, 150.3, 184.6(C=O)),  $\text{F}$  ( $\delta$  108.2, 117.5, 135.1, 147.2, 159.2(F-C), 183.5(C=O)),  $\text{Me}$  ( $\delta$  21.8(Me), 107.2, 117.6, 130.1, 136.5, 146.9, 183.3(C=O)),  $\text{NO}_2$  ( $\delta$  108.2, 117.4, 126.2, 143.4( $\text{NO}_2\text{-C}$ ), 184.2(C=O)),  $\text{COOH}$  ( $\delta$  107.2, 116.9, 130.3, 140.9, 148.1, 166.9(COOH), 183.6(C=O))(b).

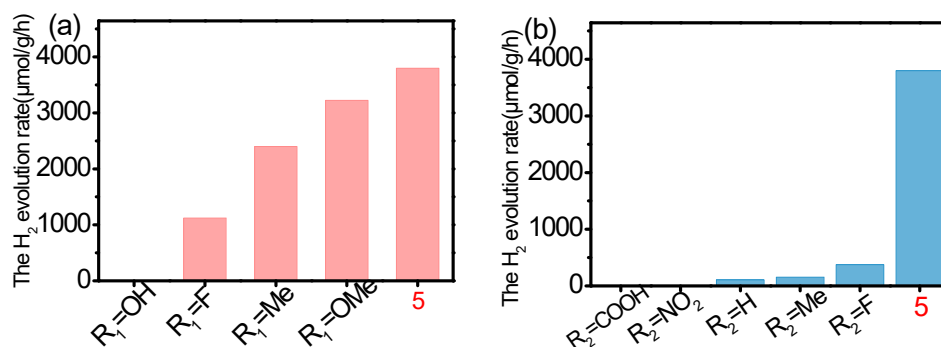

Figure S18. The photocatalytic activity of **6a-d** (**6a**: $\text{R}_1=\text{F}$ , **6b**: $\text{R}_1=\text{Me}$ , **6c**: $\text{R}_1=\text{OH}$ , **6d**: $\text{R}_1=\text{OMe}$ ) (a) and **7a-e** (**7a**: $\text{R}_2=\text{H}$ , **7b**: $\text{R}_2=\text{F}$ , **7c**: $\text{R}_2=\text{Me}$ , **7d**: $\text{R}_2=\text{NO}_2$ , **7e**: $\text{R}_2=\text{COOH}$ ) (b).

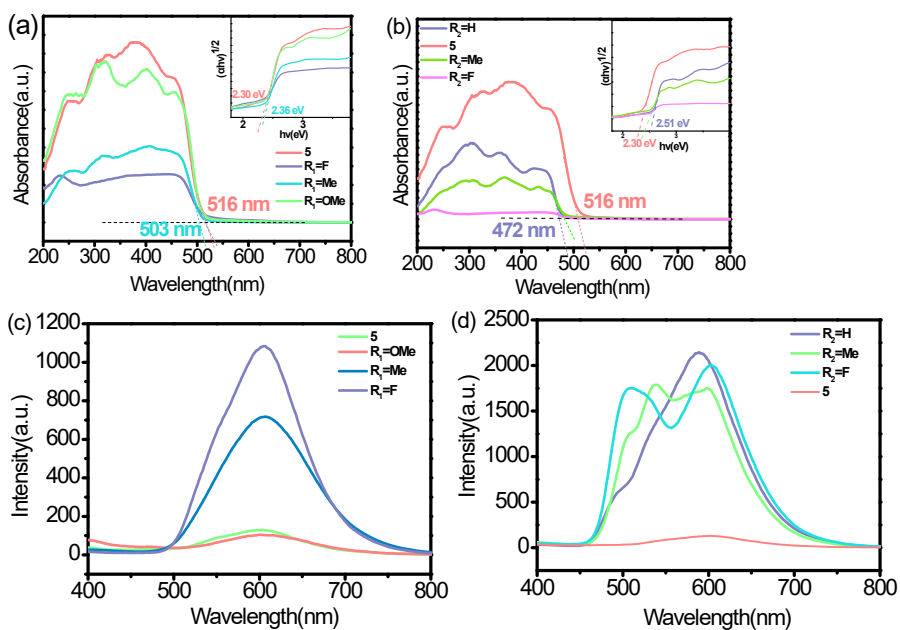

Figure S19. The UV-vis DRS (a)(b) and PL spectra(c)(d) of **6a-d** and **7a-e**, respectively.

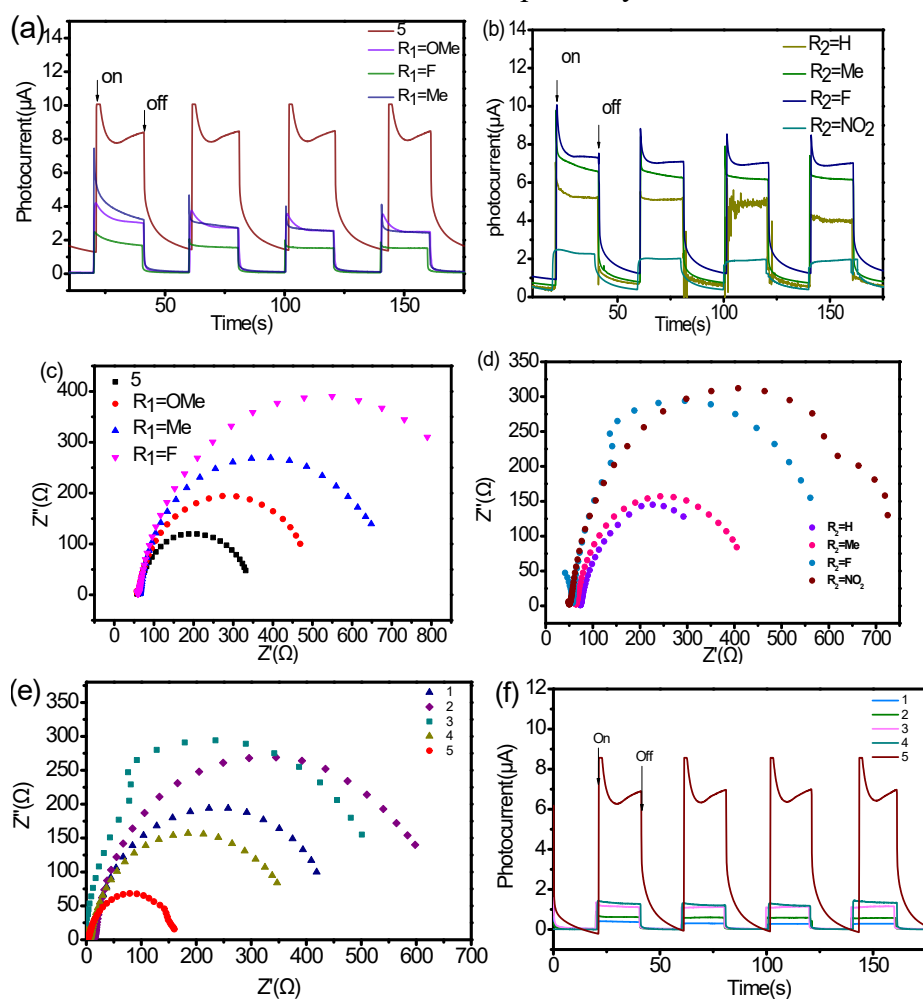

Figure S20. The photocurrent response(a)(b) and EIS spectra(c)(d) of sample with different  $R_1$  or  $R_2$  substitution. EIS spectra (f) and photocurrent response of **1-5** (e).

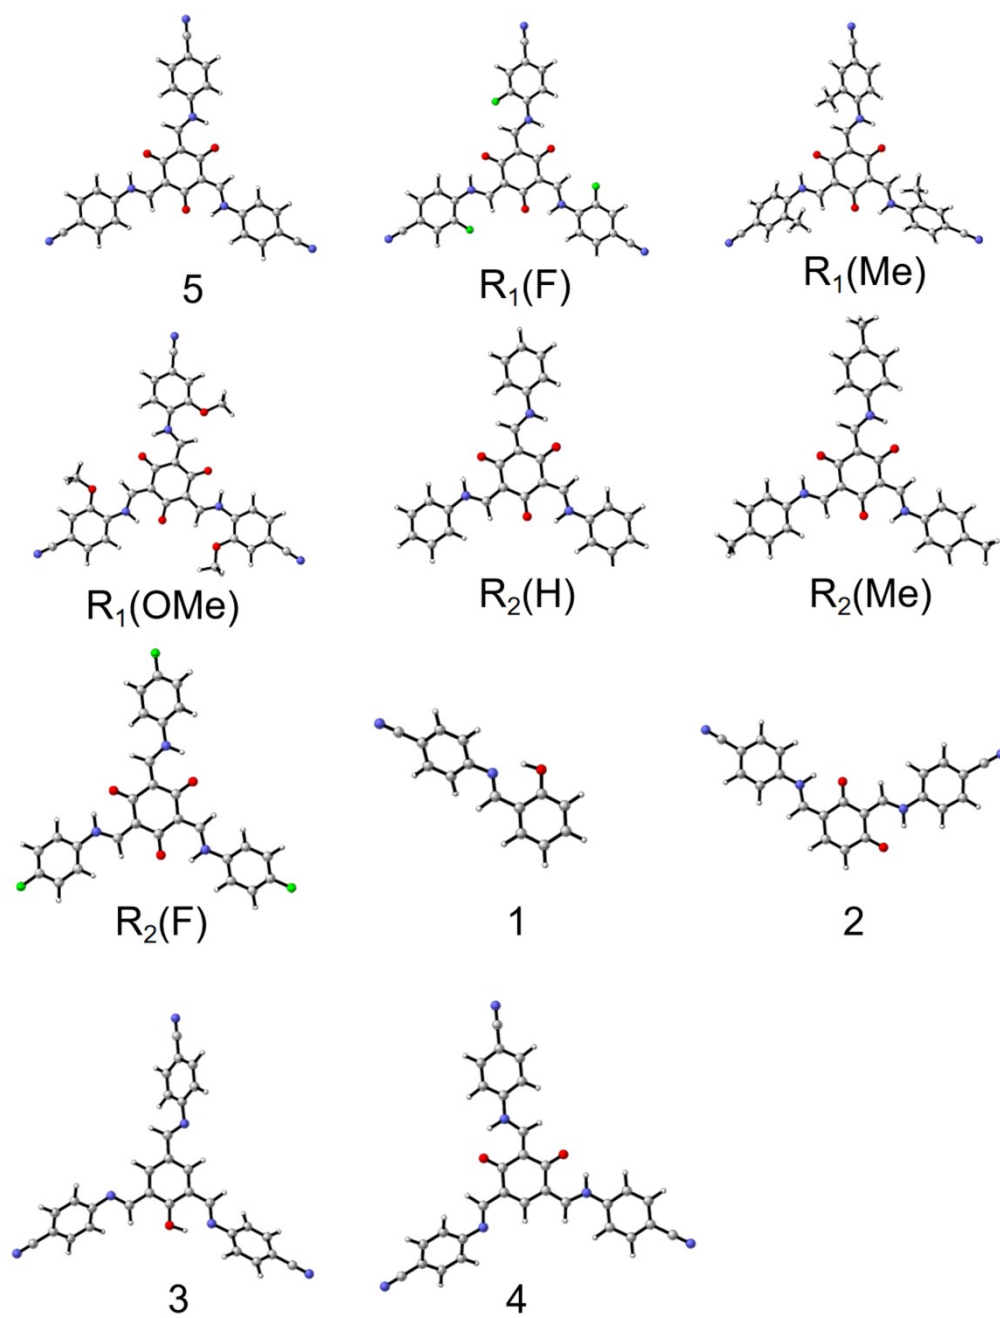

Figure S21. Optimized geometries and the corresponding structural parameters.

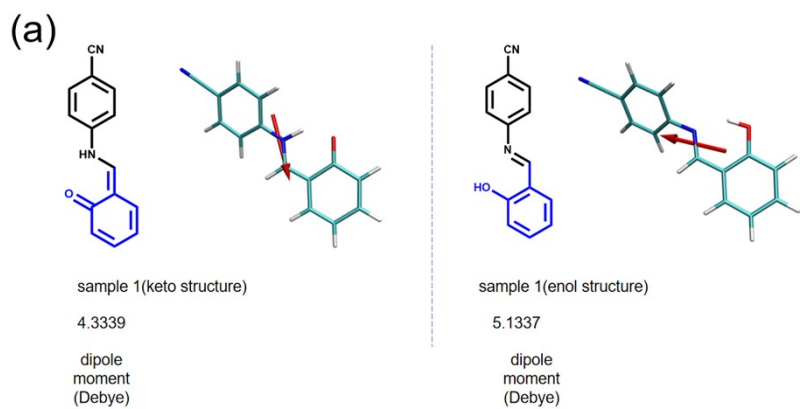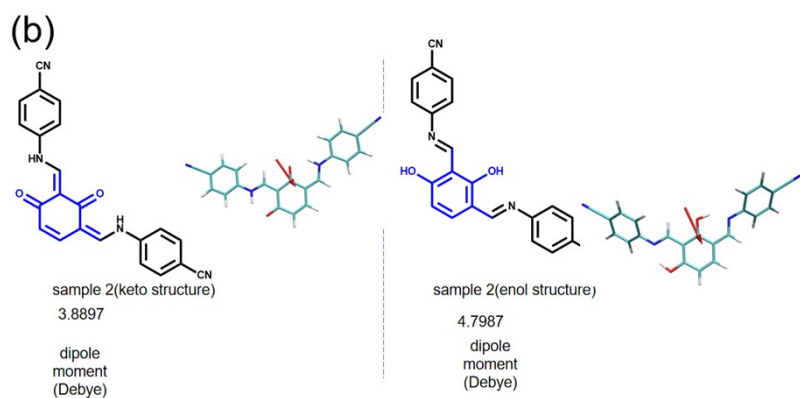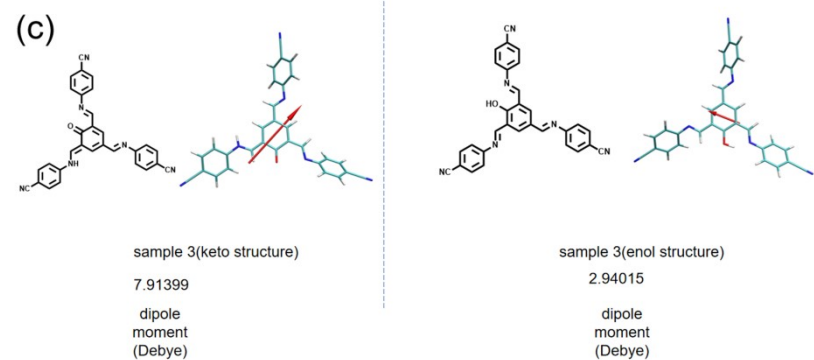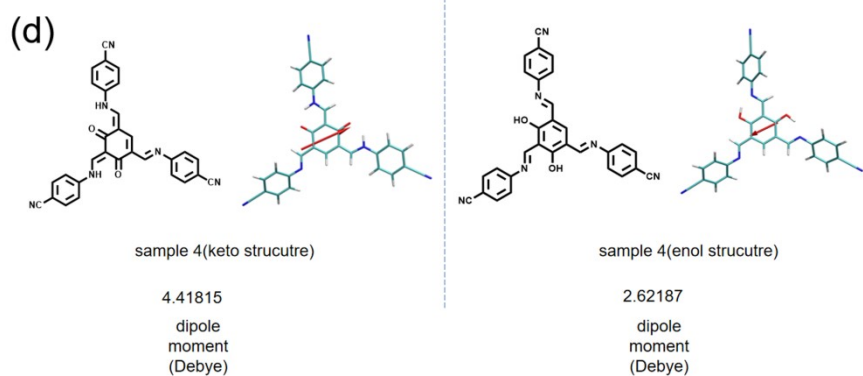

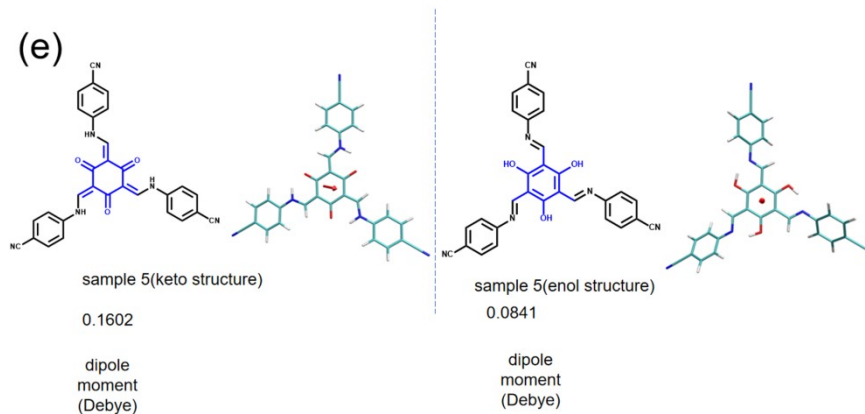

Figure S22. The dipole moment of sample 1, 2, 3, 4 and 5 with keto or enol form respectively.

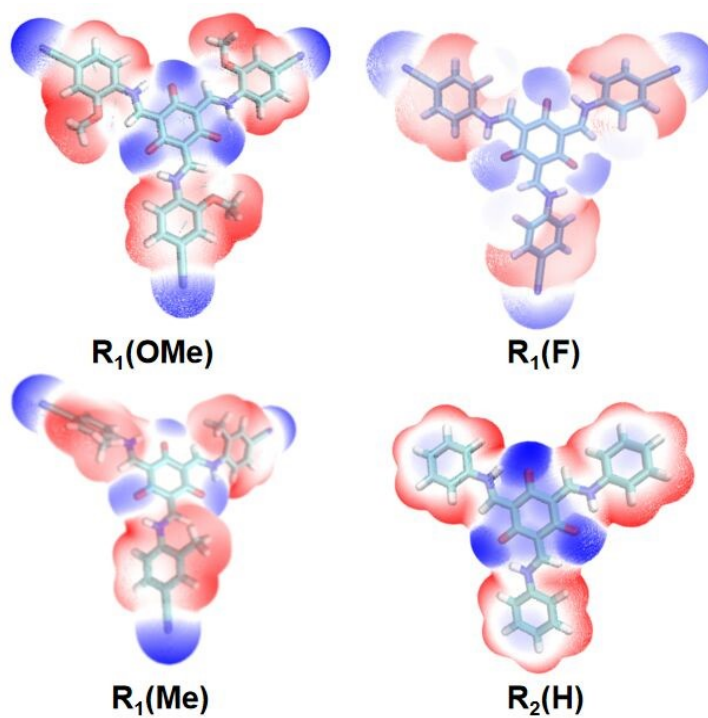

Figure S23. Electrostatic potential-mapped vdW molecular surface of **6a**, **6b**, **6d** and **7a** (isovalue=0.001 au, computed at the M062X-D3/6-31+G(d,p) level of theory)  
 Isosurface map of electrostatic potential (ESP) (isovalue=0.001 au, computed at the M062X-D3/6-31+G(d,p) level of theory).

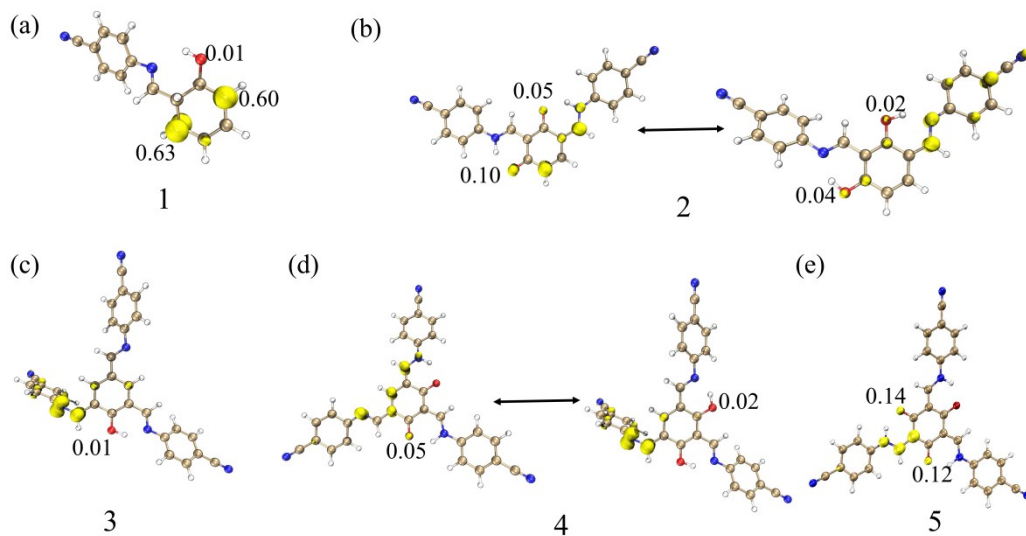

Figure S24. Spin electron density for **1-5** in the first excited triple state (T1, isovalue=0.02). The yellow domain represents the distribution of single electron.

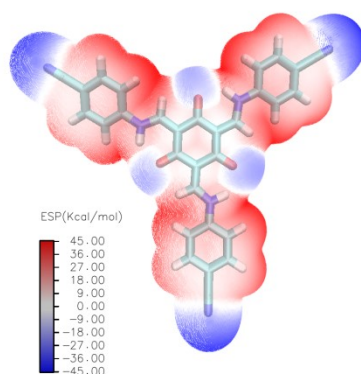

Figure S25. Electrostatic potential-mapped vdW molecular surface of **5** (isovalue=0.001 au, computed at the M062X-D3/6-31+G(d,p) level of theory)  
 Isosurface map of electrostatic potential (ESP) (isovalue=0.001 au, computed at the M062X-D3/6-31+G(d,p) level of theory).

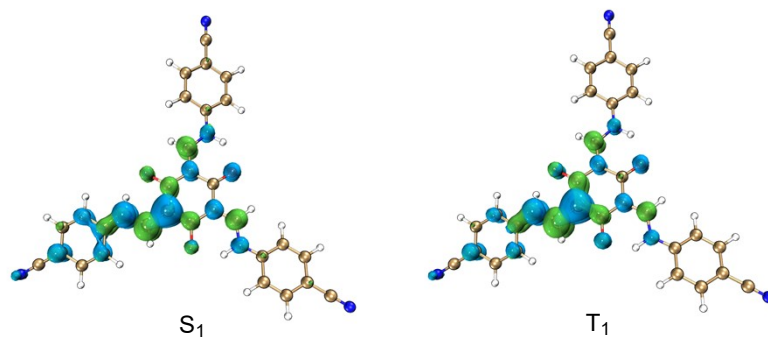

Figure S26. Space representation of hole and electron distributions of  $S_1$  and  $T_1$  states for **5**, obtained by Mutilwfn software. Green and blue isosurfaces corresponding to electron and hole distributions, respectively (isovalue = 0.02 au).

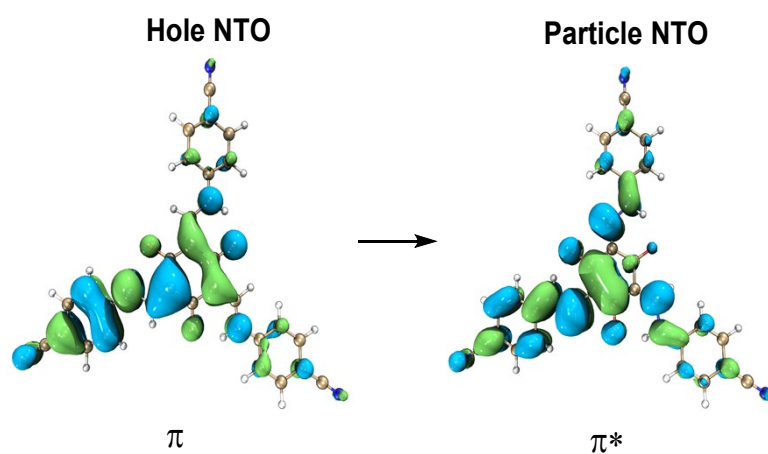

Figure S27. Dominant natural transition orbital (NTO) pair for the  $S_0 \rightarrow S_1$  transition for **5**, obtained by Mutilwfn software (isovalue = 0.002 au). The associated eigenvalue  $\lambda$  is 0.883.

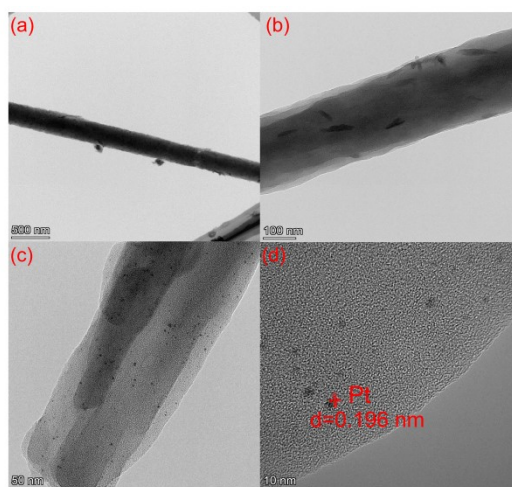

Figure S28. The TEM image of **5** before-irradiation (a and b) and after-irradiation SOM (c and d).



**Table S1.** The element containment of samples

| Element analysis                                                          | C(wt%) | H(wt%) | O(wt%) | N(wt%) |
|---------------------------------------------------------------------------|--------|--------|--------|--------|
| <b>1</b> (C <sub>14</sub> H <sub>10</sub> N <sub>2</sub> O)               | 73.25  | 6.30   | 8.67   | 11.78  |
| <b>2</b> (C <sub>22</sub> H <sub>14</sub> N <sub>4</sub> O <sub>2</sub> ) | 71.26  | 3.09   | 11.06  | 14.59  |
| <b>5</b> (C <sub>30</sub> H <sub>18</sub> N <sub>6</sub> O <sub>3</sub> ) | 70.06  | 3.11   | 10.38  | 16.45  |
| R <sub>2</sub> =Me                                                        | 69.88  | 4.91   | 11.17  | 14.04  |
| (C <sub>33</sub> H <sub>24</sub> N <sub>6</sub> O <sub>3</sub> )          |        |        |        |        |
| R <sub>1</sub> =OMe                                                       | 65.74  | 4.89   | 16.25  | 13.12  |
| (C <sub>33</sub> H <sub>24</sub> N <sub>6</sub> O <sub>6</sub> )          |        |        |        |        |
| R <sub>2</sub> =H                                                         | 72.94  | 5.17   | 12.78  | 9.11   |
| (C <sub>27</sub> H <sub>21</sub> N <sub>3</sub> O <sub>3</sub> )          |        |        |        |        |
| R <sub>2</sub> =Me                                                        | 74.72  | 5.90   | 10.71  | 8.67   |
| (C <sub>30</sub> H <sub>27</sub> N <sub>3</sub> O <sub>3</sub> )          |        |        |        |        |
| R <sub>2</sub> =NO <sub>2</sub>                                           | 56.05  | 3.49   | 27.16  | 13.30  |
| (C <sub>27</sub> H <sub>18</sub> N <sub>6</sub> O <sub>9</sub> )          |        |        |        |        |

**Table S2** The BET surface area of sample 1-5, 6a, 6b

| sample                         | BET surface area        | Pore volume(cm <sup>3</sup> /g) | Pore size(nm) |
|--------------------------------|-------------------------|---------------------------------|---------------|
| <b>1</b>                       | 0.10 m <sup>2</sup> /g  | 0.0017                          | 15.39         |
| <b>2</b>                       | 24.55 m <sup>2</sup> /g | 0.12                            | 22.67         |
| <b>3</b>                       | 43.70 m <sup>2</sup> /g | 0.18                            | 18.71         |
| <b>4</b>                       | 0.26 m <sup>2</sup> /g  | 0.0027                          | 16.78         |
| <b>5</b>                       | 48.54 m <sup>2</sup> /g | 0.20                            | 18.32         |
| <b>6a</b> (R <sub>1</sub> =F)  | 0.15 m <sup>2</sup> /g  | 0.0013                          | 15.48         |
| <b>6b</b> (R <sub>1</sub> =Me) | 0.60 m <sup>2</sup> /g  | 0.0021                          | 16.23         |

**Table S3.** The dihedral angle and dipole moment of samples.

| Sample               | dihedral angle(°) | Dipole(Debye) |
|----------------------|-------------------|---------------|
| <b>1</b> (enol form) | 41.6              | 5.13          |
| <b>1</b> (keto form) | 17.2              | 3.90          |
| <b>2</b> (enol form) | 39.6              | 4.80          |
| <b>2</b> (keto form) | 0.3               | 3.89          |
| <b>3</b>             | 0.7               | 0.16          |
| R <sub>1</sub> =OMe  | 1.1               | 0.14          |
| R <sub>1</sub> =F    | 29.5              | 2.04          |
| R <sub>1</sub> =Me   | 43.6              | 2.06          |

|                                 |     |      |
|---------------------------------|-----|------|
| R <sub>1</sub> =OH              | 1.2 | 0.20 |
| R <sub>2</sub> =H               | 1.5 | 0.48 |
| R <sub>2</sub> =Me              | 0.8 | 0.08 |
| R <sub>2</sub> =F               | 1.5 | 0.48 |
| R <sub>2</sub> =NO <sub>2</sub> | 1.5 | 0.42 |

**Table S4.** The spin population of main atoms of **5**.

| 5   | Value      | % of sum  | % of sum abs |
|-----|------------|-----------|--------------|
| C1  | 0.05826158 | 2.913091  | 2.696225     |
| C2  | 0.41842150 | 22.921170 | 21.214791    |
| C3  | 0.03800227 | 1.900122  | 1.758666     |
| C8  | 0.02176706 | 1.0088358 | 0.270390     |
| O9  | 0.13931985 | 6.966021  | 6.447432     |
| C10 | 0.41661284 | 20.830728 | 19.279974    |
| O11 | 0.14108878 | 7.054468  | 6.529295     |
| N31 | 0.26291206 | 13.145657 | 12.167022    |

**Table S5.** Electronic energies (E<sub>Z</sub>), enthalpy(H), and Gibbs free energies (G) for all stationary points (in Hartree), obtained at the M062X-D3/6-31+G\*\* theoretical level.

| Structures           | <sup>a</sup> ZPE | E <sub>Z</sub> | <sup>b</sup> H <sub>c</sub> | H           | <sup>c</sup> G <sub>c</sub> | G           |
|----------------------|------------------|----------------|-----------------------------|-------------|-----------------------------|-------------|
| 1-enol               | 0.20132          | -724.20560     | 0.21573                     | -723.98987  | 0.15976                     | -724.04584  |
| 1-keto               | 0.20071          | -724.19242     | 0.21522                     | -723.97719  | 0.15872                     | -724.03370  |
| 2-enol               | 0.30503          | -1216.1899     | 0.32863                     | -1215.8626  | 0.25020                     | -1215.94107 |
| 2-keto               | 0.30585          | -1216.1899     | 0.32981                     | -1215.8602  | 0.24988                     | -1215.94009 |
| 3-enol               | 0.40325          | -1632.9282     | 0.43557                     | -1557.2483  | 0.33552                     | -1632.59267 |
| 3-keto               | 0.40449          | -1632.9293     | 0.43714                     | -1632.4926  | 0.33523                     | -1632.59407 |
| 4-enol               | 0.39894          | -1557.6788     | 0.43049                     | -1557.2483  | 0.33113                     | -1557.34769 |
| 4-keto               | 0.39886          | -1557.6462     | 0.43087                     | -1557.2153  | 0.33116                     | -1557.31500 |
| 5                    | 0.42445          | -1707.20146    | 0.45783                     | -1707.16808 | 0.35446                     | -1707.27145 |
| R <sub>1</sub> (F)   | 0.39951          | -2004.83938    | 0.43541                     | -2004.80348 | 0.32670                     | -2004.91220 |
| R <sub>1</sub> (Me)  | 0.50864          | -1825.00909    | 0.54643                     | -1824.97130 | 0.43551                     | -1825.08221 |
| R <sub>1</sub> (OMe) | 0.52379          | -2050.54306    | 0.56481                     | -2050.50204 | 0.44449                     | -2050.62236 |
| R <sub>2</sub> (H)   | 0.42866          | -1430.54918    | 0.45651                     | -1430.52134 | 0.36663                     | -1430.61122 |
| R <sub>2</sub> (Me)  | 0.51142          | -1548.36348    | 0.54477                     | -1548.33013 | 0.44204                     | -1548.43286 |
| R <sub>2</sub> (F)   | 0.40406          | -1728.20387    | 0.43345                     | -1728.17448 | 0.34109                     | -1728.26684 |

a Zero-point correction energy;

b Thermal correction to Gibbs free energy;

c Gibbs free energy obtained using BP86-D3 and B3LYP-D3 with def2-TZVP basis set.

**Table S6.** Cartesian coordinates of all structures

| 1-enol form | X         | Y         | Z         |
|-------------|-----------|-----------|-----------|
| C           | -4.404434 | -2.254705 | 0.272098  |
| C           | -3.881099 | -3.523071 | 0.553176  |
| C           | -4.671188 | -4.480414 | 1.169737  |
| C           | -5.999379 | -4.205293 | 1.524722  |
| C           | -6.520416 | -2.953947 | 1.249024  |
| C           | -5.744004 | -1.962932 | 0.6229    |
| C           | -6.331125 | -0.662994 | 0.352984  |
| O           | -3.609051 | -1.357834 | -0.321919 |
| N           | -5.672061 | 0.293603  | -0.198275 |
| C           | -6.312996 | 1.512862  | -0.480152 |
| C           | -5.597263 | 2.697795  | -0.267441 |
| C           | -6.18352  | 3.926131  | -0.531153 |
| C           | -7.489348 | 3.981145  | -1.03636  |
| C           | -8.198132 | 2.799932  | -1.279681 |
| C           | -7.611021 | 1.571738  | -1.004864 |
| C           | -8.096357 | 5.254686  | -1.320587 |
| N           | -8.584311 | 6.280059  | -1.546481 |
| H           | -2.852157 | -3.724968 | 0.275944  |
| H           | -4.24993  | -5.458749 | 1.38042   |
| H           | -6.607787 | -4.960691 | 2.00886   |
| H           | -7.54794  | -2.717061 | 1.515466  |
| H           | -7.376468 | -0.521719 | 0.661068  |
| H           | -4.117274 | -0.519751 | -0.441607 |
| H           | -4.585108 | 2.635689  | 0.11821   |
| H           | -5.637401 | 4.846709  | -0.355001 |
| H           | -9.199888 | 2.850131  | -1.692947 |
| H           | -8.145358 | 0.653648  | -1.228145 |

  

| 1-keto form | X         | Y         | Z         |
|-------------|-----------|-----------|-----------|
| C           | -2.91807  | 0.917114  | 0.039819  |
| C           | -4.352934 | 1.096459  | 0.062384  |
| C           | -5.195239 | 0.041628  | -0.129398 |
| C           | -4.716485 | -1.289393 | -0.36259  |
| C           | -3.374688 | -1.517471 | -0.3921   |
| C           | -2.443568 | -0.448343 | -0.191004 |
| C           | -1.076847 | -0.700104 | -0.222113 |
| O           | -2.121165 | 1.876051  | 0.205274  |
| N           | -0.171883 | 0.260675  | -0.051292 |

|   |           |           |           |
|---|-----------|-----------|-----------|
| C | 1.218937  | 0.11078   | -0.034332 |
| C | 2.000998  | 1.259735  | -0.209056 |
| C | 3.383711  | 1.169347  | -0.205788 |
| C | 4.002797  | -0.074215 | -0.028746 |
| C | 3.222097  | -1.22011  | 0.159737  |
| C | 1.837859  | -1.129338 | 0.165524  |
| C | 5.43757   | -0.174724 | -0.031555 |
| N | 6.592374  | -0.25817  | -0.035528 |
| H | -4.720538 | 2.102067  | 0.236382  |
| H | -6.268709 | 0.210314  | -0.106583 |
| H | -5.422949 | -2.097662 | -0.512155 |
| H | -2.984683 | -2.518283 | -0.56611  |
| H | -0.717344 | -1.710745 | -0.409494 |
| H | -0.634189 | 1.195656  | 0.076092  |
| H | 1.513528  | 2.218392  | -0.356597 |
| H | 3.989793  | 2.057672  | -0.347013 |
| H | 3.705407  | -2.178601 | 0.31542   |
| H | 1.250617  | -2.021003 | 0.352865  |

| 2-enol form | X         | Y         | Z         |
|-------------|-----------|-----------|-----------|
| C           | -1.547137 | 0.389968  | -0.546357 |
| C           | -0.991727 | -0.89053  | -0.361422 |
| C           | -1.817176 | -1.935396 | -0.015058 |
| C           | -3.205582 | -1.769776 | 0.164173  |
| C           | -3.762697 | -0.484772 | -0.024804 |
| C           | -2.938054 | 0.603592  | -0.381223 |
| C           | -3.529535 | 1.91358   | -0.565633 |
| C           | -4.03514  | -2.892089 | 0.532953  |
| O           | -5.068017 | -0.263726 | 0.122305  |
| O           | -0.732669 | 1.383294  | -0.875976 |
| N           | -5.310199 | -2.781822 | 0.689402  |
| C           | -6.071064 | -3.888284 | 1.104711  |
| C           | -7.347227 | -4.053158 | 0.551816  |
| C           | -8.140542 | -5.126133 | 0.928082  |
| C           | -7.67156  | -6.037728 | 1.883006  |
| C           | -6.408928 | -5.862709 | 2.459804  |
| C           | -5.614359 | -4.791062 | 2.074584  |
| N           | -2.812121 | 2.937026  | -0.878218 |
| C           | -3.429663 | 4.182782  | -1.09409  |
| C           | -2.763373 | 5.331701  | -0.650492 |
| C           | -3.32952  | 6.583939  | -0.834702 |
| C           | -4.562572 | 6.701208  | -1.48918  |
| C           | -5.218573 | 5.558881  | -1.961115 |
| C           | -4.6528   | 4.305902  | -1.766615 |

|   |           |           |           |
|---|-----------|-----------|-----------|
| C | -5.148053 | 8.000531  | -1.690046 |
| N | -5.618616 | 9.04637   | -1.849005 |
| C | -8.494762 | -7.147988 | 2.283969  |
| N | -9.155221 | -8.04268  | 2.606084  |
| H | 0.075461  | -1.016053 | -0.497557 |
| H | -1.393629 | -2.926605 | 0.129521  |
| H | -4.609379 | 1.996377  | -0.408674 |
| H | -3.533438 | -3.860703 | 0.659614  |
| H | -5.500675 | -1.132699 | 0.365371  |
| H | -1.274976 | 2.21717   | -0.965093 |
| H | -7.695725 | -3.334465 | -0.182467 |
| H | -9.123721 | -5.264123 | 0.491338  |
| H | -6.062854 | -6.560317 | 3.215102  |
| H | -4.651864 | -4.633337 | 2.550785  |
| H | -1.807554 | 5.222495  | -0.148924 |
| H | -2.822664 | 7.474869  | -0.480041 |
| H | -6.162031 | 5.659844  | -2.486811 |
| H | -5.144686 | 3.422517  | -2.161298 |

| 2-keto from | X         | Y         | Z         |
|-------------|-----------|-----------|-----------|
| C           | -5.059277 | -7.175998 | -0.134002 |
| C           | -5.753228 | -5.9769   | -0.120189 |
| C           | -5.067619 | -4.764061 | 0.025805  |
| C           | -3.674881 | -4.765278 | 0.167936  |
| C           | -2.98108  | -5.966642 | 0.14814   |
| C           | -3.665623 | -7.177846 | -0.002878 |
| N           | -5.830918 | -3.589991 | 0.033307  |
| C           | -5.378585 | -2.334599 | 0.015229  |
| C           | -6.189039 | -1.217935 | 0.04299   |
| C           | -5.51651  | 0.081281  | 0.017293  |
| C           | -6.379875 | 1.26825   | 0.052898  |
| C           | -7.815335 | 1.101478  | 0.108081  |
| C           | -8.426562 | -0.101886 | 0.129752  |
| C           | -7.649027 | -1.339756 | 0.096911  |
| O           | -4.274704 | 0.176987  | -0.029866 |
| O           | -8.208419 | -2.449292 | 0.112346  |
| C           | -5.84422  | 2.53512   | 0.031992  |
| N           | -4.528756 | 2.803552  | -0.021255 |
| C           | -3.916795 | 4.057238  | -0.047965 |
| C           | -2.515112 | 4.086927  | -0.089708 |
| C           | -1.837577 | 5.293782  | -0.117427 |
| C           | -2.552698 | 6.49799   | -0.103617 |
| C           | -3.950709 | 6.470876  | -0.062684 |
| C           | -4.631787 | 5.262359  | -0.035371 |

|   |           |           |           |
|---|-----------|-----------|-----------|
| C | -2.940466 | -8.419725 | -0.018587 |
| N | -2.358577 | -9.420599 | -0.03163  |
| C | -1.855894 | 7.755168  | -0.132435 |
| N | -1.294963 | 8.767951  | -0.155854 |
| H | -5.591629 | -8.113922 | -0.248667 |
| H | -6.833817 | -5.970959 | -0.227219 |
| H | -3.124031 | -3.842338 | 0.305191  |
| H | -1.901955 | -5.970588 | 0.258098  |
| H | -6.856757 | -3.655037 | 0.052167  |
| H | -4.305037 | -2.171922 | -0.030567 |
| H | -8.419387 | 2.007036  | 0.13252   |
| H | -9.504867 | -0.203945 | 0.17039   |
| H | -6.518387 | 3.387597  | 0.060523  |
| H | -3.943984 | 1.960728  | -0.042942 |
| H | -1.962812 | 3.152139  | -0.099694 |
| H | -0.75362  | 5.311374  | -0.149608 |
| H | -4.503797 | 7.403876  | -0.05304  |
| H | -5.714631 | 5.274268  | -0.005671 |

| <b>3-keto form</b> | <b>X</b>  | <b>Y</b>  | <b>Z</b>  |
|--------------------|-----------|-----------|-----------|
| C                  | -0.652938 | -1.31353  | -0.002425 |
| C                  | 0.803058  | -1.209373 | 0.010242  |
| C                  | 1.490032  | 0.087666  | 0.036728  |
| C                  | 0.671079  | 1.295579  | 0.032108  |
| C                  | -0.795508 | 1.243165  | 0.018529  |
| C                  | -1.431788 | -0.070074 | 0.010066  |
| O                  | -1.47434  | 2.286895  | 0.010206  |
| C                  | 1.240621  | 2.549905  | 0.03828   |
| O                  | 2.733062  | 0.153937  | 0.0614    |
| C                  | 1.604622  | -2.330122 | -0.003777 |
| O                  | -1.218964 | -2.422686 | -0.020341 |
| C                  | -2.803291 | -0.203075 | 0.007236  |
| N                  | 2.554448  | 2.795432  | 0.053691  |
| C                  | 3.166038  | 4.05547   | 0.03056   |
| C                  | 4.536327  | 4.120625  | 0.313559  |
| C                  | 5.195041  | 5.339642  | 0.305109  |
| C                  | 4.489636  | 6.513553  | 0.0149    |
| C                  | 3.122514  | 6.447457  | -0.276046 |
| C                  | 2.463175  | 5.227147  | -0.275838 |
| C                  | 5.168192  | 7.781516  | 0.008701  |
| N                  | 5.714852  | 8.802147  | 0.004167  |
| N                  | -3.670207 | 0.814     | 0.010087  |
| C                  | -5.067539 | 0.716869  | 0.032887  |
| C                  | -5.805529 | 1.867669  | -0.272059 |

|   |            |           |           |
|---|------------|-----------|-----------|
| C | -7.190722  | 1.831703  | -0.267421 |
| C | -7.85725   | 0.640019  | 0.041229  |
| C | -7.119996  | -0.507091 | 0.355875  |
| C | -5.733215  | -0.470561 | 0.359732  |
| C | -9.294773  | 0.594933  | 0.042527  |
| N | -10.451952 | 0.557111  | 0.042893  |
| N | 1.154673   | -3.588425 | -0.03013  |
| C | 1.920356   | -4.759992 | -0.052367 |
| C | 1.229387   | -5.978724 | -0.064828 |
| C | 1.92209    | -7.178127 | -0.087937 |
| C | 3.321827   | -7.175468 | -0.098761 |
| C | 4.012451   | -5.958617 | -0.08655  |
| C | 3.32063    | -4.756386 | -0.064005 |
| C | 4.048184   | -8.416307 | -0.124309 |
| N | 4.63372    | -9.414929 | -0.145846 |
| H | 0.563335   | 3.399564  | 0.041728  |
| H | 2.67879    | -2.16826  | 0.007319  |
| H | -3.202405  | -1.213809 | -0.011977 |
| H | 3.135714   | 1.952183  | 0.09048   |
| H | 5.078569   | 3.209678  | 0.548219  |
| H | 6.255411   | 5.389191  | 0.527549  |
| H | 2.580345   | 7.356161  | -0.51415  |
| H | -3.227463  | 1.738603  | -0.016896 |
| H | -5.284105  | 2.786676  | -0.521874 |
| H | -7.761638  | 2.721773  | -0.508248 |
| H | -7.639398  | -1.424971 | 0.609144  |
| H | 0.131998   | -3.660845 | -0.035442 |
| H | 0.143558   | -5.977625 | -0.056347 |
| H | 1.384205   | -8.11986  | -0.09798  |
| H | 5.097046   | -5.958336 | -0.096087 |
| H | 1.410836   | 5.197461  | -0.532455 |
| H | -5.182293  | -1.361729 | 0.636235  |
| H | 3.881553   | -3.829655 | -0.057354 |

| R <sub>2</sub> (H) | X         | Y         | Z         |
|--------------------|-----------|-----------|-----------|
| C                  | -0.549504 | -1.307884 | -0.01694  |
| C                  | 0.90522   | -1.20798  | -0.001345 |
| C                  | 1.595335  | 0.085645  | 0.034213  |
| C                  | 0.780483  | 1.294353  | 0.046222  |
| C                  | -0.684943 | 1.246211  | 0.038907  |
| C                  | -1.324118 | -0.063636 | 0.01088   |
| O                  | -1.362386 | 2.293412  | 0.048732  |
| C                  | 1.355767  | 2.548773  | 0.061982  |
| O                  | 2.840806  | 0.148811  | 0.05401   |

---

|   |           |           |           |
|---|-----------|-----------|-----------|
| C | 1.704255  | -2.333685 | -0.016246 |
| O | -1.119153 | -2.41732  | -0.048102 |
| C | -2.698642 | -0.191477 | 0.001745  |
| N | 2.666551  | 2.793105  | 0.069149  |
| C | 3.277632  | 4.060423  | 0.049317  |
| C | 4.631445  | 4.140243  | 0.391293  |
| C | 5.280712  | 5.369597  | 0.384056  |
| C | 4.589693  | 6.531161  | 0.042244  |
| C | 3.242848  | 6.445617  | -0.305514 |
| C | 2.584727  | 5.219468  | -0.313289 |
| N | -3.562736 | 0.823527  | 0.021541  |
| C | -4.966194 | 0.723673  | 0.038599  |
| C | -5.706513 | 1.860643  | -0.301148 |
| C | -7.096029 | 1.813824  | -0.298012 |
| C | -7.761272 | 0.635614  | 0.037883  |
| C | -7.019426 | -0.492407 | 0.383992  |
| C | -5.628147 | -0.454735 | 0.395826  |
| N | 1.254974  | -3.588528 | -0.049171 |
| C | 2.022434  | -4.766341 | -0.064484 |
| C | 1.331877  | -5.982982 | -0.066353 |
| C | 2.03052   | -7.184525 | -0.080735 |
| C | 3.424363  | -7.189225 | -0.093168 |
| C | 4.108557  | -5.975205 | -0.092492 |
| C | 3.420738  | -4.765276 | -0.079267 |
| H | 0.681231  | 3.400781  | 0.08034   |
| H | 2.778729  | -2.173875 | 0.001934  |
| H | -3.1013   | -1.200471 | -0.037571 |
| H | 3.2483    | 1.950333  | 0.094039  |
| H | 5.165877  | 3.236242  | 0.669374  |
| H | 6.331136  | 5.41801   | 0.653012  |
| H | 2.696062  | 7.339638  | -0.588084 |
| H | -3.119932 | 1.748043  | 0.014279  |
| H | -5.185077 | 2.773452  | -0.574978 |
| H | -7.659634 | 2.701995  | -0.565172 |
| H | -7.525684 | -1.411439 | 0.661943  |
| H | 0.232717  | -3.660239 | -0.060979 |
| H | 0.245481  | -5.97855  | -0.055544 |
| H | 1.480103  | -8.119925 | -0.081804 |
| H | 5.193856  | -5.963402 | -0.103876 |
| H | 1.545877  | 5.172521  | -0.620534 |
| H | -5.070872 | -1.333347 | 0.701264  |
| H | 3.981035  | -3.837464 | -0.08268  |
| H | 5.096501  | 7.490216  | 0.040055  |
| H | 3.970876  | -8.126069 | -0.104157 |

---



|                     |           |           |           |
|---------------------|-----------|-----------|-----------|
| H                   | -8.845342 | 0.598721  | 0.037069  |
| R <sub>2</sub> (Me) | X         | Y         | Z         |
| C                   | -0.58262  | -1.317694 | 0.05654   |
| C                   | 0.872063  | -1.228225 | 0.049311  |
| C                   | 1.572799  | 0.05921   | 0.061098  |
| C                   | 0.767953  | 1.274184  | 0.059599  |
| C                   | -0.69737  | 1.237569  | 0.053826  |
| C                   | -1.347246 | -0.066997 | 0.052983  |
| O                   | -1.366573 | 2.290871  | 0.043429  |
| C                   | 1.354672  | 2.524158  | 0.062416  |
| O                   | 2.819502  | 0.112676  | 0.070809  |
| C                   | 1.660951  | -2.361429 | 0.032104  |
| O                   | -1.160065 | -2.423893 | 0.068012  |
| C                   | -2.723343 | -0.183078 | 0.037541  |
| N                   | 2.667045  | 2.756089  | 0.065315  |
| C                   | 3.289851  | 4.018272  | 0.040819  |
| C                   | 4.637163  | 4.097527  | 0.39799   |
| C                   | 5.2922    | 5.324918  | 0.387822  |
| C                   | 4.628704  | 6.499971  | 0.029728  |
| C                   | 3.281229  | 6.400554  | -0.332848 |
| C                   | 2.61373   | 5.181771  | -0.34004  |
| N                   | -3.57806  | 0.83918   | 0.028231  |
| C                   | -4.982986 | 0.752498  | 0.024076  |
| C                   | -5.71179  | 1.884711  | -0.345439 |
| C                   | -7.102278 | 1.846212  | -0.36294  |
| C                   | -7.800848 | 0.686085  | -0.022305 |
| C                   | -7.054728 | -0.435127 | 0.35613   |
| C                   | -5.665426 | -0.41166  | 0.390563  |
| N                   | 1.207215  | -3.61451  | 0.025712  |
| C                   | 1.99893   | -4.77744  | -0.04096  |
| C                   | 1.452474  | -5.982367 | 0.403785  |
| C                   | 2.203302  | -7.152591 | 0.345456  |
| C                   | 3.51028   | -7.153636 | -0.145954 |
| C                   | 4.037541  | -5.938992 | -0.596952 |
| C                   | 3.29763   | -4.762903 | -0.55839  |
| H                   | 0.688276  | 3.382753  | 0.074188  |
| H                   | 2.73869   | -2.216394 | 0.036327  |
| H                   | -3.134723 | -1.189239 | 0.017687  |
| H                   | 3.240416  | 1.907417  | 0.095373  |
| H                   | 5.166742  | 3.196036  | 0.693408  |
| H                   | 6.340264  | 5.366645  | 0.672385  |
| H                   | 2.74144   | 7.296568  | -0.629596 |
| H                   | -3.126246 | 1.759223  | 0.007955  |

|   |           |           |           |
|---|-----------|-----------|-----------|
| H | -5.183877 | 2.792103  | -0.625205 |
| H | -7.652768 | 2.737243  | -0.65288  |
| H | -7.572543 | -1.346619 | 0.644695  |
| H | 0.186953  | -3.692458 | 0.07363   |
| H | 0.441647  | -5.997319 | 0.801554  |
| H | 1.762763  | -8.081971 | 0.696633  |
| H | 5.045208  | -5.913337 | -1.00457  |
| H | 1.577893  | 5.143269  | -0.659272 |
| H | -5.124265 | -1.291459 | 0.721501  |
| H | 3.723363  | -3.847296 | -0.954967 |
| C | 5.335329  | 7.831346  | 0.013069  |
| H | 5.432082  | 8.212726  | -1.008621 |
| H | 4.783771  | 8.577962  | 0.592249  |
| H | 6.33916   | 7.74922   | 0.43649   |
| C | -9.306681 | 0.63121   | -0.065098 |
| H | -9.652448 | 0.013141  | -0.900309 |
| H | -9.712471 | 0.199646  | 0.854547  |
| H | -9.734529 | 1.62892   | -0.188405 |
| C | 4.335258  | -8.414772 | -0.188313 |
| H | 4.799734  | -8.549798 | -1.169456 |
| H | 5.138484  | -8.382405 | 0.55525   |
| H | 3.722002  | -9.294627 | 0.020298  |

| R2(F) | X         | Y         | Z         |
|-------|-----------|-----------|-----------|
| C     | -0.569015 | -1.31312  | -0.044457 |
| C     | 0.885737  | -1.222227 | -0.030858 |
| C     | 1.584716  | 0.065655  | 0.008892  |
| C     | 0.777901  | 1.27911   | 0.034885  |
| C     | -0.687174 | 1.240487  | 0.045579  |
| C     | -1.335061 | -0.064694 | 0.010021  |
| O     | -1.357777 | 2.292169  | 0.074414  |
| C     | 1.363805  | 2.528816  | 0.047171  |
| O     | 2.83094   | 0.120627  | 0.023387  |
| C     | 1.675026  | -2.354473 | -0.057593 |
| O     | -1.145263 | -2.418475 | -0.096983 |
| C     | -2.710601 | -0.181966 | 0.016926  |
| N     | 2.676608  | 2.760924  | 0.04267   |
| C     | 3.287949  | 4.029052  | 0.001451  |
| C     | 4.60019   | 4.148641  | 0.469771  |
| C     | 5.247012  | 5.378803  | 0.44564   |
| C     | 4.561959  | 6.480297  | -0.043416 |
| C     | 3.264201  | 6.388425  | -0.521048 |
| C     | 2.628522  | 5.150889  | -0.509163 |
| N     | -3.564854 | 0.840178  | 0.064574  |

|   |           |           |           |
|---|-----------|-----------|-----------|
| C | -4.968896 | 0.747583  | 0.108563  |
| C | -5.714548 | 1.870194  | -0.265609 |
| C | -7.103821 | 1.83521   | -0.238017 |
| C | -7.730796 | 0.664605  | 0.159822  |
| C | -7.016851 | -0.459419 | 0.543459  |
| C | -5.626165 | -0.412746 | 0.528288  |
| N | 1.217924  | -3.605984 | -0.100884 |
| C | 2.003712  | -4.774318 | -0.0872   |
| C | 1.443016  | -5.953401 | -0.588226 |
| C | 2.174384  | -7.135655 | -0.590854 |
| C | 3.468989  | -7.116791 | -0.095402 |
| C | 4.046817  | -5.964361 | 0.412718  |
| C | 3.30355   | -4.787847 | 0.426915  |
| H | 0.699414  | 3.389353  | 0.074711  |
| H | 2.752935  | -2.209602 | -0.056601 |
| H | -3.123621 | -1.186747 | -0.032781 |
| H | 3.252092  | 1.913185  | 0.066655  |
| H | 5.109229  | 3.274193  | 0.864001  |
| H | 6.262564  | 5.492884  | 0.807298  |
| H | 2.772733  | 7.271854  | -0.912703 |
| H | -3.113031 | 1.760877  | 0.063479  |
| H | -5.199825 | 2.770381  | -0.588162 |
| H | -7.698844 | 2.694542  | -0.525477 |
| H | -7.548011 | -1.348381 | 0.864546  |
| H | 0.19652   | -3.676807 | -0.147873 |
| H | 0.43259   | -5.938138 | -0.985678 |
| H | 1.758796  | -8.059669 | -0.976465 |
| H | 5.056182  | -5.999434 | 0.806862  |
| H | 1.629164  | 5.063077  | -0.920993 |
| H | -5.064023 | -1.277176 | 0.863692  |
| H | 3.735269  | -3.892498 | 0.860379  |
| F | 5.180222  | 7.677246  | -0.062509 |
| F | 4.186014  | -8.258037 | -0.100079 |
| F | -9.077678 | 0.621149  | 0.182512  |

| R1(OMe) | X         | Y         | Z         |
|---------|-----------|-----------|-----------|
| H       | -2.836071 | 2.224038  | 0.012768  |
| C       | 1.466515  | -0.162807 | -0.006203 |
| C       | 0.861814  | 1.164584  | -0.005023 |
| C       | -0.591593 | 1.352442  | 0.003065  |
| C       | -1.438652 | 0.165559  | 0.009065  |
| C       | -0.87464  | -1.187461 | 0.008057  |
| C       | 0.576981  | -1.327431 | 0.000413  |
| O       | -1.617929 | -2.191016 | 0.013406  |

---

|   |            |            |           |
|---|------------|------------|-----------|
| C | -2.817698  | 0.252738   | 0.014927  |
| C | 1.62633    | 2.315741   | -0.012392 |
| O | 2.707357   | -0.304757  | -0.012841 |
| C | 1.191575   | -2.565042  | -0.001405 |
| N | -3.47908   | 1.419407   | 0.016369  |
| C | -4.846963  | 1.701713   | 0.020557  |
| C | -5.206399  | 3.053204   | 0.01947   |
| C | -6.533268  | 3.456901   | 0.022967  |
| C | -7.535158  | 2.487212   | 0.02769   |
| C | -7.203317  | 1.126274   | 0.029033  |
| C | -5.871715  | 0.726162   | 0.025533  |
| C | -8.920792  | 2.872529   | 0.031033  |
| N | -10.037485 | 3.179077   | 0.033522  |
| N | 0.512425   | -3.721274  | 0.004013  |
| C | 0.950473   | -5.047341  | 0.002514  |
| C | -0.041677  | -6.032765  | 0.00285   |
| C | 0.269096   | -7.384503  | 0.002103  |
| C | 1.609228   | -7.769626  | 0.000944  |
| C | 2.623146   | -6.803535  | 0.000696  |
| C | 2.306948   | -5.449331  | 0.00156   |
| C | 1.96558    | -9.162993  | 0.000131  |
| N | 2.256352   | -10.283889 | -0.000479 |
| N | 2.967243   | 2.305801   | -0.020628 |
| C | 3.896087   | 3.348824   | -0.030666 |
| C | 5.245798   | 2.982586   | -0.038373 |
| C | 6.260702   | 3.92763    | -0.049337 |
| C | 5.924378   | 5.280959   | -0.052972 |
| C | 4.58061    | 5.675652   | -0.045072 |
| C | 3.566102   | 4.724767   | -0.033772 |
| C | 6.952802   | 6.286237   | -0.065711 |
| N | 7.778492   | 7.098137   | -0.076433 |
| H | -3.389446  | -0.665213  | 0.018284  |
| H | 1.115496   | 3.269254   | -0.01161  |
| H | 2.272532   | -2.59989   | -0.007659 |
| H | -4.414861  | 3.796931   | 0.015527  |
| H | -6.790768  | 4.509559   | 0.021923  |
| H | -7.999575  | 0.392807   | 0.032909  |
| H | -0.505739  | -3.56675   | 0.009332  |
| H | -1.080947  | -5.717252  | 0.003614  |
| H | -0.515438  | -8.132226  | 0.002348  |
| H | 3.655717   | -7.128604  | -0.000009 |
| H | 3.343342   | 1.346965   | -0.020329 |
| H | 5.492541   | 1.924927   | -0.035772 |
| H | 7.300441   | 3.622161   | -0.055285 |

---

|   |           |           |           |
|---|-----------|-----------|-----------|
| H | 4.346107  | 6.732337  | -0.048159 |
| O | -1.08908  | 2.498228  | 0.00442   |
| O | -5.484238 | -0.571813 | 0.026553  |
| O | 3.239595  | -4.46688  | 0.001855  |
| O | 2.249123  | 5.041673  | -0.025496 |
| C | -6.483626 | -1.577719 | 0.029648  |
| H | -7.105579 | -1.507343 | 0.928448  |
| H | -7.110033 | -1.50838  | -0.866134 |
| H | -5.945976 | -2.524557 | 0.028908  |
| C | 1.882829  | 6.411719  | -0.027455 |
| H | 2.266146  | 6.918788  | 0.864564  |
| H | 2.250038  | 6.911908  | -0.930054 |
| H | 0.794215  | 6.42432   | -0.017658 |
| C | 4.609451  | -4.833392 | 0.002615  |
| H | 4.858375  | -5.410277 | 0.899704  |
| H | 4.85967   | -5.409325 | -0.89472  |
| H | 5.16377   | -3.896284 | 0.003495  |

| R1=F | X         | Y         | Z         |
|------|-----------|-----------|-----------|
| C    | -0.626243 | -1.318708 | -0.053476 |
| C    | 0.825302  | -1.162472 | -0.0517   |
| C    | 1.462586  | 0.159123  | -0.050005 |
| C    | 0.602116  | 1.338481  | -0.055046 |
| C    | -0.861015 | 1.229932  | -0.056195 |
| C    | -1.450828 | -0.105876 | -0.064857 |
| O    | -1.577282 | 2.248789  | -0.047149 |
| C    | 1.123018  | 2.615391  | -0.051234 |
| O    | 2.703852  | 0.268293  | -0.04079  |
| C    | 1.671176  | -2.251357 | -0.039746 |
| O    | -1.151806 | -2.448453 | -0.042314 |
| C    | -2.816746 | -0.29213  | -0.067703 |
| N    | 2.440311  | 2.8728    | -0.04868  |
| C    | 3.107972  | 4.09542   | -0.026014 |
| C    | 4.499423  | 4.076711  | 0.153855  |
| C    | 5.242494  | 5.24499   | 0.180824  |
| C    | 4.60208   | 6.479933  | 0.0273    |
| C    | 3.217811  | 6.527062  | -0.158839 |
| C    | 2.500876  | 5.347452  | -0.185168 |
| C    | 5.362897  | 7.699871  | 0.056898  |
| N    | 5.980869  | 8.678311  | 0.082     |
| N    | -3.703664 | 0.714405  | -0.068693 |
| C    | -5.096375 | 0.639156  | -0.031778 |
| C    | -5.814925 | 1.760438  | 0.405533  |
| C    | -7.199953 | 1.757375  | 0.449461  |

|   |            |           |           |
|---|------------|-----------|-----------|
| C | -7.905446  | 0.615168  | 0.054147  |
| C | -7.212971  | -0.511386 | -0.398701 |
| C | -5.833492  | -0.478567 | -0.441327 |
| C | -9.342671  | 0.595716  | 0.107255  |
| N | -10.499157 | 0.582117  | 0.1534    |
| N | 1.239      | -3.521838 | -0.034642 |
| C | 1.976571   | -4.703787 | 0.006944  |
| C | 1.29407    | -5.894159 | 0.298026  |
| C | 1.951109   | -7.112447 | 0.345584  |
| C | 3.327894   | -7.169565 | 0.101048  |
| C | 4.03059    | -5.999367 | -0.199646 |
| C | 3.350665   | -4.798766 | -0.245986 |
| C | 4.023465   | -8.427049 | 0.155545  |
| N | 4.580032   | -9.44091  | 0.202322  |
| H | 0.429921   | 3.448709  | -0.047887 |
| H | 2.739467   | -2.067026 | -0.029603 |
| H | -3.191304  | -1.310256 | -0.061593 |
| H | 3.009372   | 2.014979  | -0.035874 |
| H | 4.991721   | 3.116909  | 0.277788  |
| H | 6.316378   | 5.207059  | 0.322988  |
| H | 2.692261   | 7.4663    | -0.288789 |
| H | -3.260537  | 1.642441  | -0.037009 |
| H | -5.261444  | 2.639677  | 0.720642  |
| H | -7.738934  | 2.632399  | 0.79425   |
| H | -7.731463  | -1.404812 | -0.727922 |
| H | 0.212341   | -3.592499 | -0.020694 |
| H | 0.227395   | -5.844322 | 0.494461  |
| H | 1.405078   | -8.019864 | 0.576286  |
| H | 5.094954   | -6.010449 | -0.405317 |
| F | 1.171313   | 5.42337   | -0.381983 |
| F | -5.188612  | -1.559017 | -0.916751 |
| F | 4.047419   | -3.690716 | -0.560044 |

| R1=Me | X         | Y         | Z         |
|-------|-----------|-----------|-----------|
| C     | -0.677161 | -1.326279 | -0.335321 |
| C     | 0.776132  | -1.213151 | -0.319839 |
| C     | 1.458224  | 0.084689  | -0.287776 |
| C     | 0.634686  | 1.286996  | -0.252719 |
| C     | -0.83056  | 1.228261  | -0.252938 |
| C     | -1.459999 | -0.086787 | -0.288709 |
| O     | -1.515347 | 2.269371  | -0.225351 |
| C     | 1.204143  | 2.543326  | -0.243306 |
| O     | 2.702893  | 0.156112  | -0.29075  |
| C     | 1.582116  | -2.331295 | -0.336313 |

|   |            |           |           |
|---|------------|-----------|-----------|
| O | -1.23489   | -2.439662 | -0.381991 |
| C | -2.83239   | -0.222297 | -0.294509 |
| N | 2.516468   | 2.790849  | -0.242081 |
| C | 3.107515   | 4.072129  | -0.28739  |
| C | 4.195546   | 4.239487  | -1.151807 |
| C | 4.838292   | 5.461915  | -1.252651 |
| C | 4.381364   | 6.533694  | -0.478722 |
| C | 3.310172   | 6.357317  | 0.400123  |
| C | 2.659789   | 5.129178  | 0.526284  |
| C | 5.025093   | 7.817867  | -0.572583 |
| N | 5.541879   | 8.850893  | -0.650397 |
| N | -3.705894  | 0.78693   | -0.251533 |
| C | -5.110835  | 0.648937  | -0.278658 |
| C | -5.82283   | 1.526387  | -1.104765 |
| C | -7.203976  | 1.461927  | -1.182456 |
| C | -7.881843  | 0.501608  | -0.42422  |
| C | -7.170468  | -0.357237 | 0.416496  |
| C | -5.780171  | -0.297194 | 0.51931   |
| C | -9.316592  | 0.407456  | -0.494127 |
| N | -10.470274 | 0.330874  | -0.552205 |
| N | 1.155467   | -3.596525 | -0.363566 |
| C | 2.002842   | -4.727337 | -0.361242 |
| C | 1.707993   | -5.759728 | -1.258367 |
| C | 2.495258   | -6.898788 | -1.308589 |
| C | 3.594638   | -7.002591 | -0.4501   |
| C | 3.872784   | -5.980276 | 0.459827  |
| C | 3.082733   | -4.832845 | 0.535131  |
| C | 4.4314     | -8.17348  | -0.487493 |
| N | 5.103739   | -9.115366 | -0.5174   |
| H | 0.53435    | 3.399158  | -0.258228 |
| H | 2.657608   | -2.172491 | -0.341606 |
| H | -3.236461  | -1.229505 | -0.356839 |
| H | 3.101795   | 1.951293  | -0.308295 |
| H | 4.51794    | 3.39836   | -1.757793 |
| H | 5.676006   | 5.594781  | -1.928082 |
| H | 2.991615   | 7.192191  | 1.017353  |
| H | -3.276614  | 1.717977  | -0.275205 |
| H | -5.273211  | 2.249895  | -1.698951 |
| H | -7.756706  | 2.13643   | -1.826838 |
| H | -7.716544  | -1.074159 | 1.022626  |
| H | 0.139896   | -3.704809 | -0.44049  |
| H | 0.862453   | -5.647621 | -1.930001 |
| H | 2.273362   | -7.696775 | -2.008349 |
| H | 4.710311   | -6.093102 | 1.141871  |

|   |           |           |          |
|---|-----------|-----------|----------|
| C | 1.565428  | 4.973367  | 1.553627 |
| H | 0.571029  | 5.144814  | 1.129512 |
| H | 1.571109  | 3.972024  | 1.992813 |
| H | 1.708434  | 5.699326  | 2.356509 |
| C | -5.074242 | -1.192525 | 1.508087 |
| H | -4.741664 | -2.130887 | 1.053028 |
| H | -4.196412 | -0.701666 | 1.936533 |
| H | -5.753673 | -1.447523 | 2.323951 |
| C | 3.379249  | -3.800824 | 1.595794 |
| H | 4.033113  | -3.004059 | 1.227433 |
| H | 2.462323  | -3.333843 | 1.964782 |
| H | 3.884002  | -4.275117 | 2.439861 |

## References:

- [1] K. Teramura, K. Maeda, T. Saito, T. Takata, N. Saito, Y. Inoue,; K. Domen, *J. Phys. Chem. B.* **2005**, 109, 46, 21915–21921.
- [2] Frisch, M. J.; Trucks, G. W.; Schlegel, H. B.; Scuseria, G. E.; Robb, M. A.; Cheeseman, J. R.; Scalmani, G.; Barone, V.; Mennucci, B.; Petersson, G. A.; Nakatsuji, H.; Caricato, M.; Li, X.; Hratchian, H. P.; Izmaylov, A. F.; Bloino, J.; Zheng, G.; Sonnenberg, J. L.; Hada, M.; Ehara, M.; Toyota, K.; Fukuda, R.; Hasegawa, J.; Ishida, M.; Nakajima, T.; Honda, Y.; Kitao, O.; Nakai, H.; Vreven, T.; Montgomery, J. A.; Peralta, J. J. E.; Ogliaro, F.; Bearpark, M.; Heyd, J. J.; Brothers, E.; Kudin, K. N.; taroverov, V. N.; Keith, T.; Kobayashi, R.; Normand, J.; Raghavachari, K.; Rendell, A.; Burant, J. C.; Iyengar, S. S.; Tomasi, J.; Cossi, M.; Rega, N.; Millam, J. M.; Klene, M.; Knox, J. E.; Cross, J. B.; Bakken, V.; Adamo, C.; Jaramillo, J.; Gomperts, R.; Stratmann, R. E.; Yazyev, O.; Austin, A. J.; Cammi, R.; Pomelli, C.; Ochterski, J. W.; Martin, R. L.; Morokuma, K.; Zakrzewski, V. G.; Voth, G. A.; Salvador, P.; Dannenberg, J. J.; Dapprich, S.; Daniels, A. D.; Farkas, O.; Foresman, J. B.; Ortiz, J. V.; Cioslowski, J.; Fox, D. J. *Gaussian 09 (Revision D.01)*. Gaussian, Wallingford, CT, **2013**.
- [3] Zhao, Y. and Truhlar, D. G. Density Functionals with Broad Applicability in Chemistry, *Acc. Chem. Res.* **2008**, 41(2), 157–167.
- [4] Jacquemin, D.; Perpète E. A.; Ciofini, I.; Adamo, C.; Valero, R.; Zhao, Y.; Truhlar, D. G. On the Performances of the M06 Family of Density Functionals for Electronic Excitation Energies, *J. Chem. Theory Comput.* **2010**, 6, 2071–2085.
- [5] Grimme, S.; Antony, J.; Ehrlich, S.; Krieg, H. A Consistent and Accurate ab Initio Parametrization of Density Functional Dispersion Correction (DFT-D) for the 94 Elements H-Pu. *J. Chem. Phys.* **2010**, 132, 154104–154119.
- [6] Grimme, S.; Ehrlich, S.; Goerigk, L. Effect of the Damping Function in Dispersion Corrected Density Functional Theory. *J. Comput. Chem.* **2011**, 32, 1456–1465.
- [7] Lu, T.; Chen, F. Multiwfn: A Multifunctional Wavefunction Analyzer. *J. Comput. Chem.* **2012**, 33, 580–592.
- [8] Humphrey, W.; Dalke, A.; Schulten. K. VMD: Visual Molecular Dynamics. *J. Mol. Grap.* **1996**, 14, 33-38.
